# Supplementary material for: Genotype-phenotype relations of the von Hippel-Lindau tumor suppressor inferred from a large-scale analysis of disease mutations and interactors
Source: PubMed Central journal article supplement (PMC6464237; doi:10.1371/journal.pcbi.1006478), 2019-04-03
Supplement: pcbi.1006478.s010.pdf [file pcbi.1006478.s010.pdf]

# SURFACE A

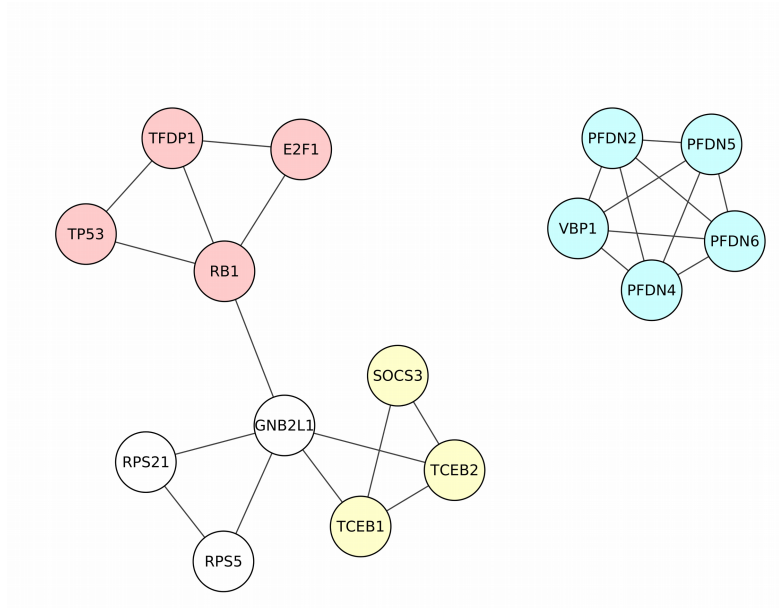

- cluster 1 (light blue): score 5; nodes 5; edges 10
- cluster 2 (pink): score 3.333; nodes 4; edges 5
- cluster 3 (yellow): score 3; nodes 3; edges 3

## MCODE App Results

### Parameters:

#### Network Scoring:

Include Loops: false Degree Cutoff: 2

#### Cluster Finding:

Node Score Cutoff: 0.2 Haircut: true Fluff: false K-Core: 2 Max. Depth from Seed: 100

| Cluster | Score (Density*#Nodes) | Nodes | Edges | Node IDs                         |
|---------|------------------------|-------|-------|----------------------------------|
| 1       | 5                      | 5     | 10    | PFDN2, PFDN6, VBP1, PFDN4, PFDN5 |
| 2       | 3,333                  | 4     | 5     | RB1, TP53, E2F1, TFDP1           |
| 3       | 3                      | 3     | 3     | TCEB2, SOCS3, TCEB1              |

| name   | MCODE_Cluster | MCODE_Node_Status | MCODE_Score        |
|--------|---------------|-------------------|--------------------|
| PFDN4  | Cluster 1     | Clustered         | 4.0                |
| VBP1   | Cluster 1     | Clustered         | 4.0                |
| PFDN2  | Cluster 1     | Clustered         | 4.0                |
| PFDN5  | Cluster 1     | Clustered         | 4.0                |
| PFDN6  | Cluster 1     | Seed              | 4.0                |
| TFDP1  | Cluster 2     | Clustered         | 1.6666666666666667 |
| E2F1   | Cluster 2     | Clustered         | 2.0                |
| RB1    | Cluster 2     | Clustered         | 1.6666666666666667 |
| TP53   | Cluster 2     | Seed              | 2.0                |
| TCEB1  | Cluster 3     | Clustered         | 1.6666666666666667 |
| TCEB2  | Cluster 3     | Clustered         | 1.6666666666666667 |
| SOCS3  | Cluster 3     | Seed              | 2.0                |
| RPS21  |               | Unclustered       | 2.0                |
| RPS5   |               | Unclustered       | 2.0                |
| GNB2L1 |               | Unclustered       | 1.2                |

## SURFACE C

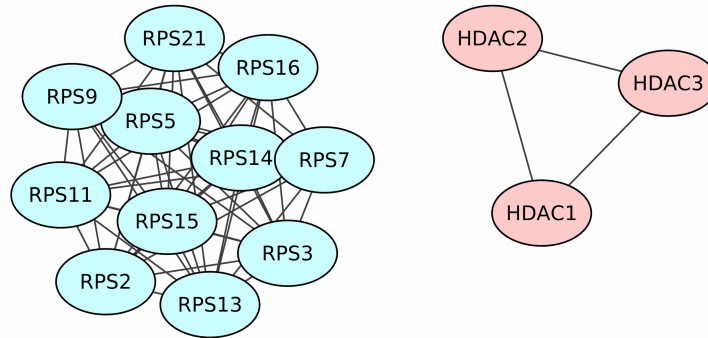

- cluster 1 (light blue): score 11; nodes 11; edges 55
- cluster 2 (pink): score 3; nodes 3; edges 3

### MCODE App Results

#### Parameters:

##### Network Scoring:

Include Loops: false Degree Cutoff: 2

##### Cluster Finding:

Node Score Cutoff: 0.2 Haircut: true Fluff: false K-Core: 2 Max. Depth from Seed: 100

| Cluster | Score (Density*#Nodes) | Nodes | Edges | Node IDs                                                               |
|---------|------------------------|-------|-------|------------------------------------------------------------------------|
| 1       | 11                     | 11    | 55    | RPS7, RPS13, RPS9, RPS15, RPS21, RPS5, RPS11, RPS14, RPS16, RPS3, RPS2 |
| 2       | 3                      | 3     | 3     | HDAC1, HDAC2, HDAC3                                                    |

| name  | MCODE_Cluster | MCODE_Node_Status | MCODE_Score |
|-------|---------------|-------------------|-------------|
| RPS14 | Cluster 1     | Clustered         | 10.0        |
| RPS5  | Cluster 1     | Clustered         | 10.0        |
| RPS15 | Cluster 1     | Clustered         | 10.0        |
| RPS9  | Cluster 1     | Clustered         | 10.0        |
| RPS13 | Cluster 1     | Clustered         | 10.0        |
| RPS7  | Cluster 1     | Clustered         | 10.0        |
| RPS2  | Cluster 1     | Clustered         | 10.0        |
| RPS3  | Cluster 1     | Clustered         | 10.0        |
| RPS16 | Cluster 1     | Clustered         | 10.0        |
| RPS11 | Cluster 1     | Clustered         | 10.0        |
| RPS21 | Cluster 1     | Seed              | 10.0        |
| HDAC2 | Cluster 2     | Clustered         | 2.0         |
| HDAC1 | Cluster 2     | Clustered         | 2.0         |
| HDAC3 | Cluster 2     | Seed              | 2.0         |

## SURFACE B

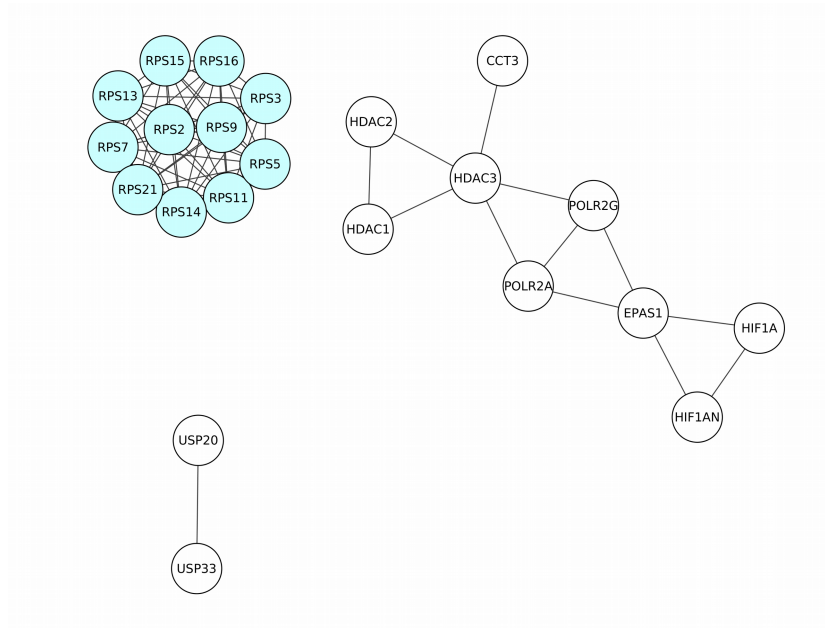

- cluster 1 (light blue): score 11; nodes 11; edges 55

### MCODE App Results

#### Parameters:

Network Scoring:

Include Loops: false Degree Cutoff: 2

Cluster Finding:

Node Score Cutoff: 0.2 Haircut: true Fluff: false K-Core: 2 Max. Depth from Seed: 100

Cluster Score (Density\*#Nodes)

Nodes Edges Node IDs

| Cluster | Density | #Nodes | Score | Node IDs                                                               |
|---------|---------|--------|-------|------------------------------------------------------------------------|
| 1       | 11      | 11     | 55    | RPS7, RPS3, RPS21, RPS5, RPS9, RPS2, RPS15, RPS11, RPS13, RPS16, RPS14 |

| name   | MCODE_Cluster | MCODE_Node_Status | MCODE_Score        |
|--------|---------------|-------------------|--------------------|
| RPS15  | Cluster 1     | Clustered         | 10.0               |
| RPS2   | Cluster 1     | Clustered         | 10.0               |
| RPS5   | Cluster 1     | Clustered         | 10.0               |
| RPS3   | Cluster 1     | Clustered         | 10.0               |
| RPS7   | Cluster 1     | Clustered         | 10.0               |
| RPS14  | Cluster 1     | Clustered         | 10.0               |
| RPS16  | Cluster 1     | Clustered         | 10.0               |
| RPS13  | Cluster 1     | Clustered         | 10.0               |
| RPS11  | Cluster 1     | Clustered         | 10.0               |
| RPS9   | Cluster 1     | Clustered         | 10.0               |
| RPS21  | Cluster 1     | Seed              | 10.0               |
| POLR2A |               | Unclustered       | 1.6666666666666667 |
| POLR2G |               | Unclustered       | 1.6666666666666667 |
| HIF1A  |               | Unclustered       | 2.0                |
| HIF1AN |               | Unclustered       | 2.0                |
| HDAC2  |               | Unclustered       | 2.0                |
| HDAC1  |               | Unclustered       | 2.0                |
| HDAC3  |               | Unclustered       | 1.2                |
| CCT3   |               | Unclustered       | 0.0                |
| USP33  |               | Unclustered       | 0.0                |
| USP20  |               | Unclustered       | 0.0                |
| EPAS1  |               | Unclustered       | 1.2                |

## C – TERMINAL REGION

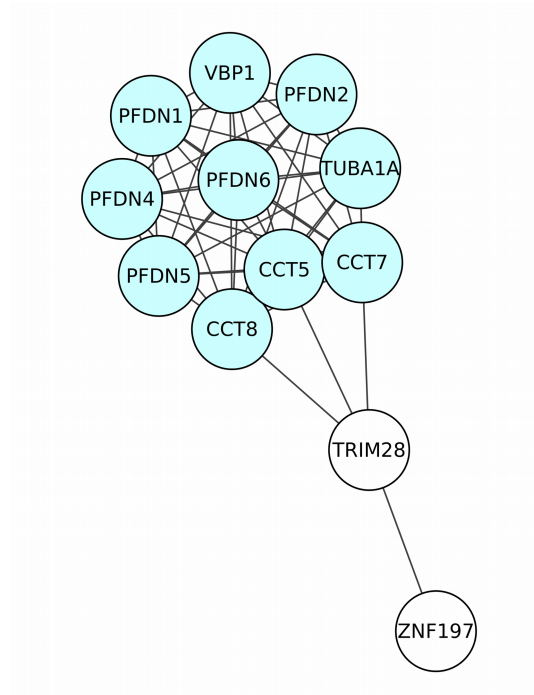

- cluster 1 (light blue): score 10; nodes 10; edges 45

### MCODE App Results

#### Parameters:

##### Network Scoring:

Include Loops: false Degree Cutoff: 2

##### Cluster Finding:

Node Score Cutoff: 0.2 Haircut: true Fluff: false K-Core: 2 Max. Depth from Seed: 100

| Cluster | Score (Density*#Nodes) | Nodes | Edges | Node IDs                                                          |
|---------|------------------------|-------|-------|-------------------------------------------------------------------|
| 1       | 10                     | 10    | 45    | PFDN5, PFDN1, CCT7, CCT8, PFDN2, PFDN4, PFDN6, TUBA1A, CCT5, VBP1 |

| name   | MCODE_Cluster | MCODE_Node_Status | MCODE_Score |
|--------|---------------|-------------------|-------------|
| PFDN4  | Cluster 1     | Clustered         | 9.0         |
| PFDN2  | Cluster 1     | Clustered         | 9.0         |
| CCT8   | Cluster 1     | Clustered         | 9.0         |
| CCT7   | Cluster 1     | Clustered         | 9.0         |
| PFDN5  | Cluster 1     | Clustered         | 9.0         |
| VBP1   | Cluster 1     | Clustered         | 9.0         |
| CCT5   | Cluster 1     | Clustered         | 9.0         |
| PFDN6  | Cluster 1     | Clustered         | 9.0         |
| PFDN1  | Cluster 1     | Clustered         | 9.0         |
| TUBA1A | Cluster 1     | Seed              | 9.0         |
| ZNF197 |               | Unclustered       | 0.0         |
| TRIM28 |               | Unclustered       | 3.0         |
