# Supplementary material for: Genotype-phenotype relations of the von Hippel-Lindau tumor suppressor inferred from a large-scale analysis of disease mutations and interactors
Source: PLoS Comput Biol. 2019 Apr 3;15(4):e1006478. doi: 10.1371/journal.pcbi.1006478 (PMC6464237; doi:10.1371/journal.pcbi.1006478)
Supplement: S6 Table — Mutations are mapped for affected interface and divided for each associated cancer. (XLSX) [file pcbi.1006478.s006.xlsx]

## Sheet: renal phenotypes
surface	codon	Variant	Effect	#	Disease	PubMed ID	SCORE	verified
D	1	c.3G>A	p.Met1Ile	1	clear cell renal cell carcinoma (RCC)	11793370	5	Y
D	7	c.19A>G	p.Asn7Asp	1	renal cell carcinoma (RCC)	11536052	5	Y
D	10	c.29A>G	p.Glu10Gly	2	clear cell renal cell carcinoma (RCC)	11793370	5	Y
D	10	c.29A>G	p.Glu10Gly	1	clear cell renal cell carcinoma (RCC)	11793370	5	Y
A	11	c.31G>A	p.Ala11Thr	1	51-year-old Taiwanese man who had bilateral renal cell carcinoma (right-sided tumor)	19933033	5	Y
D	12	c.34G>A	p.Glu12Lys	2	clear cell renal cell carcinoma (RCC)	11793370	5	Y
D	25	c.74C>T	p.Pro25Leu	1	clear cell renal cell carcinoma (RCC)	24727139	5	Y
D	25	c.73C>T	p.Pro25Ser	1	renal cell carcinoma (RCC)	11536052	5	Y
D	25	c.73C>T	p.Pro25Ser	1	renal cell carcinoma (RCC)	11536052	5	Y
D	26	c.77A>G	p.Glu26Gly	1	clear cell renal cell carcinoma (RCC)	11793370	5	Y
D	26	c.76G>A	p.Glu26Lys	1	clear cell renal cell carcinoma (RCC)	11793370	5	Y
D	28	c.83A>G	p.Asp28Gly	1	clear cell renal cell carcinoma (RCC)	23036577	5	Y
D	28	c.83A>G	p.Asp28Gly	1	clear cell renal cell carcinoma (RCC)	23036577	5	Y
D	28	c.83A>T	p.Asp28Val	1	clear cell renal cell carcinoma (RCC)	11793370	5	Y
D	29	c.84G>T	p.Gly29Cys	1	clear cell renal cell carcinoma (RCC)	24471421	5	Y
D	31	c.92A>G	p.Glu31Gly	1	clear cell renal cell carcinoma (RCC)	11793370	5	Y
D	33	c.97T>G	p.Ser33Glu	1	renal cell carcinoma (RCC)	11967908	5	Y
D	37	c.322G>A	p.Glu37Lys	1	renal cell carcinoma (RCC)	11536052	5	Y
D	38	c.113C>T	p.Ser38Phe	1	clear cell renal cell carcinoma (RCC)	15932632	5	Y
D	39	c.116G>A	p.Gly39Asp	1	clear cell renal cell carcinoma (RCC)	11793370	5	Y
D	39	c.115G>A	p.Gly39Ser	1	clear cell renal cell carcinoma (RCC)	11793370	5	Y
D, B	39.97	c.115G>A & 291C>A	p.Gly39Ser & p.Pro97Pro	1	clear cell renal cell carcinoma (RCC)	15932632	5	Y
D	40	c.119C>T	p.Pro40Leu	1	clear cell renal cell carcinoma (RCC)	24727139	5	Y
D	40	c.118C>T	p.Pro40Ser	1	renal cell carcinoma (RCC)	10454237	5	Y
D	40	c.118C>T	p.Pro40Ser	1	renal cell carcinoma (RCC)	11536052	5	Y
D	40.49	c.118C>T & 145G>T	p.Pro40Ser & p.Gly49Cys	1	clear cell renal cell carcinoma (RCC)	15932632	5	Y
D	41	c.125A>T	p.Glu41Val	1	clear cell renal cell carcinoma (RCC)	15932632	5	Y
D, B	41.61	c.122A>T & 183C>T	p.Glu41Val & p.Pro61Pro	1	clear cell renal cell carcinoma (RCC)	15932632	5	Y
D	44	c.131G>A	p.Gly44Asp	1	renal cell carcinoma (RCC)	11536052	5	Y
D	47	c.139_141GAA>AAT	p.Glu47Asn	1	clear cell renal cell carcinoma (RCC)	24471421	5	Y
D	47	c.139-141GA>AG	p.Glu47Lys	1	clear cell renal cell carcinoma (RCC)	11793370	5	Y
D	48	c.142C>G	p.Leu48Val	1	clear cell renal cell carcinoma (RCC)	15932632	5	Y
D	49	c.146G>A	p.Gly49Asp	1	renal cell carcinoma (RCC)	11536052	5	Y
D	49.4	c.145G>T & 118C>T	p.Gly49Cys & p.Pro40Ser	1	clear cell renal cell carcinoma (RCC)	15932632	5	Y
D	50	c.148G>C	p.Ala50Pro	1	renal cell carcinoma (RCC)	11536052	5	Y
D	50	c.148G>A	p.Ala50Thr	1	clear cell renal cell carcinoma (RCC)	24471421	5	Y
D	50	c.148G>A	p.Ala50Thr	1	renal cell carcinoma (RCC)	11536052	5	Y
D	50	c.149C>T	p.Ala50Val	1	clear cell renal cell carcinoma (RCC)	23036577	5	Y
D	50	c.149C>T	p.Ala50Val	1	clear cell renal cell carcinoma (RCC)	23036577	5	Y
D, B	50.74	c.149C>G & 221T>C	p.Ala50Gly & p.Val74Ala	1	clear cell renal cell carcinoma (RCC)	15932632	5	Y
D, B	51.95	c.151G>C & 284C>G	p.Glu51Gln & p.Pro95Arg	1	clear cell renal cell carcinoma (RCC)	15932632	5	Y
D	52	c.154G>A	p.Glu52Lys	1	Renal phenotype	15300849	5	Y
D	58	c.172C>T	p.Arg58Trp	1	clear cell renal cell carcinoma (RCC)	24166983	5	Y
B	60	c.178C>T	p.Arg60Trp	1	renal cell carcinoma (RCC)	11536052	5	Y
B, D	61.41	c.183C>T & 122A>T	p.Pro61Pro & p.Glu41Val	1	clear cell renal cell carcinoma (RCC)	15932632	5	Y
B	65	c.194C>T	p.Ser65Leu	1	renal cell carcinoma (RCC)	11505222	5	Y
B	65	c.194C>T	p.Ser65Leu	1	clear cell renal cell carcinoma (RCC)	7915601	5	Y
B	65	c.194C>T	p.Ser65Leu	1	clear cell renal cell carcinoma (ccRCC)	21715564	5	Y
B	65	c.194C>T	p.Ser65Leu	1	clear cell renal cell carcinoma (RCC)	23797736	5	Y
B	65	c.194C>T	p.Ser65Leu	1	clear cell renal cell carcinoma (RCC)	24166983	5	Y
B	65	c.194C>T	p.Ser65Leu	1	Renal phenotype	15300849	5	Y
B	65	c.194T>C	p.Ser65Leu	1	clear cell renal cell carcinoma (RCC)	24727139	5	Y
B	65	c.194C>T	p.Ser65Leu	1	Clear cell renal cell carcinoma (ccRCC)	28853079	5	Y
B	65	c.194C>T	p.Ser65Leu	1	renal cell carcinoma (RCC)	11536052	5	Y
B	65	c.194C>T	p.Ser65Leu	1	RCC	20054297	5	Y
B	65	c.193T>C	p.Ser65Pro	1	renal cell carcinoma (RCC)	11505222	5	Y
B	65	c.193T>C	p.Ser65Pro	1	Renal phenotype	15300849	5	Y
B	65	c.193T>A	p.Ser65Thr	1	clear cell renal cell carcinoma (ccRCC)	21715564	5	Y
B	65	c.194C>G	p.Ser65Trp	1	Clear cell renal cell carcinoma (ccRCC)	28853079	5	Y
B	65		p.Ser65Trp	1	clear cell renal cell carcinoma (RCC)	19755989	5	Y
B	67	c.200A>G	p.Asn67Ser	1	clear cell renal cell carcinoma (RCC)	12781449	5	Y
B	68	c.203C>T	p.Ser68Leu	1	clear cell renal cell carcinoma (RCC)	11921283	5	Y
B	68	c.202T>A	p.Ser68Thr	1	clear cell renal cell carcinoma (ccRCC)	21715564	5	Y
B	68	c.202T>A & 203C>A	p.Ser68Thr & p.Ser68X	1	clear cell renal cell carcinoma (RCC)	15932632	5	Y
B	69	c.205C>T & 472delCT	p.Arg69Cys & Frameshift	1	renal cell carcinoma (RCC) after trichloroethylene exposure [Patient 1676]	10340905	5	Y
B	72	c.214T>C	p.Ser72Pro	1	clear cell renal cell carcinoma (ccRCC)	21715564	5	Y
B	72	c.214T>C	p.Ser72Pro	1	clear cell renal cell carcinoma (RCC)	11921283	5	Y
B	73	c.217C>A	p.Gln73Lys	1	clear cell renal cell carcinoma (RCC)	24166983	5	Y
B	74	c.221T>A	p.Val74Asp	1	clear cell renal cell carcinoma (RCC)	15932632	5	Y
B	74	c.221T>A	p.Val74Asp	1	clear cell renal cell carcinoma (ccRCC)	21715564	5	Y
B	74	c.221T>A	p.Val74Asp	1	clear cell renal cell carcinoma (RCC); brain metastasis	10766184	5	Y
B	74	c.221T>A	p.Val74Asp	1	renal cell carcinoma (RCC)	11051223	5	Y
B	76	c.227T>C	p.Phe76Ser	1	clear cell renal cell carcinoma (RCC)	24166983	5	Y
B	76		p.Phe76Ser	1	clear cell renal cell carcinoma (RCC)	19755989	5	Y
B	78	c.232A>G	p.Asn78Asp	1	clear cell renal cell carcinoma (RCC)	24727139	5	Y
B	78	c.232A>G	p.Asn78Asp	1	clear cell renal cell carcinoma (RCC)	16488999	5	Y
B	78		p.Asn78His	1	clear cell renal cell carcinoma (RCC)	19755989	5	Y
B	78	c.233A>T	p.Asn78Ile	1	clear cell renal cell carcinoma (RCC)	24727139	5	Y
B	78	c.233A>T	p.Asn78Ile	1	Clear cell renal cell carcinoma (ccRCC)	28853079	5	Y
B	78	c.234T>A	p.Asn78Lys	1	clear cell renal cell carcinoma (ccRCC)	21715564	5	Y
B	78	c.234T>A	p.Asn78Lys	1	clear cell renal cell carcinoma (RCC)	16488999	5	Y
B	78	c.234T>G	p.Asn78Lys	1	clear cell renal cell carcinoma (ccRCC)	21715564	5	Y
B	78	c.234T>G	p.Asn78Lys	1	Sarcomatoid / clear cell renal cell carcinoma (RCC)	11921283	5	Y
B	78	c.234T>G	p.Asn78Lys	1	Clear cell renal cell carcinoma (ccRCC)	28853079	5	Y
B	78	c.233A>G	p.Asn78Ser	1	Clear cell renal cell carcinoma (RCC)	7591282	5	Y
B	78	c.233A>G	p.Asn78Ser	1	right renal cell carcinoma (RCC) [Patient F1-II-3]	23842656	5	Y
B	78	c.233A>G	p.Asn78Ser	1	Von Hippel-Lindau syndrome Type 1: clear cell renal cell carcinoma (ccRCC)	21715564	5	Y
B	78	c.233A>G	p.Asn78Ser	1	Renal phenotype	15300849	5	Y
B	78	c.233A>G	p.Asn78Ser	1	renal cell carcinoma (RCC) [Family 12, Father]	28388566	5	Y
B	78	c.232A>T	p.Asn78Tyr	1	clear cell renal cell carcinoma (ccRCC)	21715564	5	Y
B	78	c.234T>A	p.Asn78Tyr	1	clear cell papillary renal cell carcinoma (RCC)	21602815	5	Y
B	78	A>T	p.Asn78Tyr	1	clear cell renal cell carcinoma (RCC)	23036577	5	Y
B	78		p.Asn78Tyr	1	clear cell renal cell carcinoma (RCC)	19755989	5	Y
B	79	c.236G>A	p.Arg79His	1	renal cell carcinoma (RCC)	11536052	5	Y
B	79	c.226GC>CA	p.Arg79Pro	1	clear cell renal cell carcinoma (RCC)	10766184	5	Y
B	80	c.238A>C	p.Ser80Arg	1	Renal phenotype	15300849	5	Y
B	80	c.240T>A	p.Ser80Arg	1	renal cell carcinoma (RCC)	7881415	5	Y
B	80	c.240T>A	p.Ser80Arg	1	clear cell renal cell carcinoma (RCC)	15932632	5	Y
B	80	c.240T>A	p.Ser80Arg	1	clear cell papillary renal cell carcinoma (RCC)	21602815	5	Y
B	80	c.240T>A	p.Ser80Arg	1	clear cell renal cell carcinoma (ccRCC)	21715564	5	Y
B	80	c.240T>A	p.Ser80Arg	1	clear cell renal cell carcinoma (RCC)	10766184	5	Y
B	80	c.240T>A	p.Ser80Arg	1	clear cell renal cell carcinoma (RCC)	16488999	5	Y
B	80	c.240T>G	p.Ser80Arg	1	clear cell renal cell carcinoma (RCC)	24166983	5	Y
B	80		p.Ser80Arg	1	clear cell renal cell carcinoma (RCC)	19755989	5	Y
B	80		p.Ser80Arg	1	clear cell renal cell carcinoma (RCC)	19755989	5	Y
B	80	c.239G>A	p.Ser80Asn	1	Von Hippel-Lindau syndrome Type 1: clear cell renal cell carcinoma (ccRCC)	21715564	5	Y
B	80	c.239G>A	p.Ser80Asn	1	clear cell renal cell carcinoma (RCC)	23797736	5	Y
B	80	c.239G>A	p.Ser80Asn	1	clear cell renal cell carcinoma (RCC)	23797736	5	Y
B	80	c.239G>A	p.Ser80Asn	1	clear cell renal cell carcinoma (RCC)	24166983	5	Y
B	80	c.239G>A	p.Ser80Asn	1	Renal phenotype	15300849	5	Y
B	80	c.239G>A	p.Ser80Asp	1	clear cell renal cell carcinoma (RCC)	11921283	5	Y
B	81	c.241C>T	p.Pro81Ser	1	clear cell renal cell carcinoma (RCC)	15932632	5	Y
B	81	c.241C>T	p.Pro81Ser	1	renal cell carcinoma (RCC) after trichloroethylene exposure [Patient 1665]	10340905	5	Y
B	81	c.241C>T	p.Pro81Ser	1	renal cell carcinoma (RCC) after trichloroethylene exposure [Patient 1654]	10340905	5	Y
B	81	c.241C>T	p.Pro81Ser	1	renal cell carcinoma (RCC) after trichloroethylene exposure [Patient 1657]	10340905	5	Y
B	81	c.241C>T	p.Pro81Ser	1	renal cell carcinoma (RCC) after trichloroethylene exposure [Patient 1670]	10340905	5	Y
B	81	c.241C>T	p.Pro81Ser	1	renal cell carcinoma (RCC) after trichloroethylene exposure [Patient 1653]	10340905	5	Y
B	81	c.241C>T	p.Pro81Ser	1	renal cell carcinoma (RCC) after trichloroethylene exposure [Patient 1656]	10340905	5	Y
B	81	c.241C>T	p.Pro81Ser	1	renal cell carcinoma (RCC) after trichloroethylene exposure [Patient 1668]	10340905	5	Y
B	81	c.241C>T	p.Pro81Ser	1	renal cell carcinoma (RCC) after trichloroethylene exposure [Patient 1678]	10340905	5	Y
B	81	c.241C>T	p.Pro81Ser	8	clear cell renal cell carcinoma (RCC) with occupational TCE exposure	15177666	5	Y
B	81	c.241C>A	p.Pro81Thr	1	clear cell papillary renal cell carcinoma (RCC)	21602815	5	Y
B, C	81.119	c.241C>T, c.357C>G	p.Pro81Ser, p.Phe119Leu	1	renal cell carcinoma (RCC) after trichloroethylene exposure [Patient 1694]	10340905	5	Y
B, A	81.167	c.241C>T, c.500G>A	p.Pro81Ser, p.Arg167Gln	1	renal cell carcinoma (RCC) after trichloroethylene exposure [Patient 1658]	10340905	5	Y
B, A	81.167	c.241C>T, c.499C>T	p.Pro81Ser, p.Arg167Trp	1	renal cell carcinoma (RCC) after trichloroethylene exposure [Patient 1659]	10340905	5	Y
B, E	81.2	c.241C>T, c.598C>T	p.Pro81Ser, p.Arg200Trp	1	renal cell carcinoma (RCC) after trichloroethylene exposure [Patient 1693]	10340905	5	Y
B	82	c.244C>T	p.Arg82Cys	1	renal cell carcinoma (RCC). Cell line ACHN	7977367	5	Y
B	82	c.244C>G	p.Arg82Gly	1	renal cell carcinoma (RCC)	Rothberg 2001 vedi paper Nordstrom 20151405	5	Y
B	82	c.245G>C	p.Arg82Pro	1	renal cell carcinoma (RCC)	9059819	5	Y
B	82	c.245G>C	p.Arg82Pro	1	clear cell renal cell carcinoma (RCC)	7915601	5	Y
B	82	c.245G>C	p.Arg82Pro	1	Unclassified renal cell carcinoma (RCC)	15932632	5	Y
B	82	c.245G>C	p.Arg82Pro	1	clear cell renal cell carcinoma (ccRCC)	21715564	5	Y
B	82	c.245G>C	p.Arg82Pro	1	Renal phenotype	15300849	5	Y
B, D	83.25	c.247G>A & c.74C>T	p.Val83Ile & p.Pro25Leu	1	51-year-old Taiwanese man who had bilateral renal cell carcinoma (left-sided tumor)	19933033	5	Y
B	84	c.251T>A	p.Val84Glu	1	clear cell renal cell carcinoma (ccRCC)	21715564	5	Y
B	85	c.254T>C	p.Leu85Pro	2	renal cell carcinoma (RCC)	11505222	5	Y
B	85	c.254T>C	p.Leu85Pro	1	Clear cell renal cell carcinoma (RCC)	7591282	5	Y
B	85	c.254T>C	p.Leu85Pro	1	clear cell renal cell carcinoma (RCC)	23797736	5	Y
B	85	c.254T>C	p.Leu85Pro	1	renal cell carcinoma (RCC)	11051223	5	Y
B	85	c.254T>C	p.Leu85Pro	1	renal cell carcinoma (RCC)	11536052	5	Y
B	86	c.256C>G	p.Pro86Ala	1	clear cell renal cell carcinoma (RCC)	19996202	5	Y
B	86	c.257C>A	p.Pro86Arg	1	renal cell carcinoma (RCC)	11505222	5	Y
B	86	c.257C>A	p.Pro86His	1	clear cell renal cell carcinoma (RCC)	7915601	5	Y
B	86	c.257C>A	p.Pro86His	1	renal cell carcinoma (RCC)	11505222	5	Y
B	86	c.257C>A	p.Pro86His	1	Clear cell renal cell carcinoma (RCC)	10408776	5	Y
B	86	c.257C>A	p.Pro86His	1	clear cell renal cell carcinoma (ccRCC)	21715564	5	Y
B	86	c.257C>A	p.Pro86His	1	clear cell renal cell carcinoma (RCC)	24727139	5	Y
B	86	c.257C>A	p.Pro86His	1	clear cell renal cell carcinoma (RCC)	24166983	5	Y
B	86	c.257C>A	p.Pro86His	1	clear cell renal cell carcinoma (RCC)	11921283	5	Y
B	86	c.257C>T	p.Pro86Leu	1	clear cell renal cell carcinoma (RCC)	24166983	5	Y
B	86	c.257C>T	p.Pro86Leu	1	clear cell renal cell carcinoma (RCC)	16488999	5	Y
B	86	c.257C>T	p.Pro86Leu	1	Patient 243, age 50. RCC	21463266	5	Y
B	86	c.256C>T	p.Pro86Ser	1	renal cell carcinoma (RCC). Tumor no. 53	7977367	5	Y
B	86	c.256C>T	p.Pro86Ser	1	Renal phenotype	15300849	5	Y
B	86	c.256C>T	p.Pro86Ser	1	RCC	20054297	5	Y
B	86	c.256C>A	p.Pro86Thr	1	clear cell renal cell carcinoma (ccRCC)	21715564	5	Y
B	86	c.256C>A	p.Pro86Thr	1	clear cell renal cell carcinoma (RCC)	24727139	5	Y
B	86	c.256C>A	p.Pro86Thr	1	clear cell renal cell carcinoma (RCC)	23797736	5	Y
B	86	c.340+8C>T & 257C>T	Splice & p.Pro86Leu	1	renal cell carcinoma (RCC) after trichloroethylene exposure [Patient 1667]	10340905	5	Y
B	87	c.260T>C	p.Val87Ala	1	Renal phenotype	15300849	5	Y
B	88	c.262T>A	p.Trp88Arg	1	Sarcomatoid / clear cell renal cell carcinoma (RCC)	11921283	5	Y
B	88	c.262T>A	p.Trp88Arg	1	clear cell renal cell carcinoma (RCC)	16488999	5	Y
B	88	c.262T>C	p.Trp88Arg	1	clear cell renal cell carcinoma (ccRCC)	21715564	5	Y
B	88	c.262T>C	p.Trp88Arg	1	clear cell renal cell carcinoma (RCC)	10766184	5	Y
B	88	T>C	p.Trp88Arg	1	clear cell renal cell carcinoma (RCC)	23036577	5	Y
B	88	c.262T>A	p.Trp88Arg	1	clear cell renal cell carcinoma (RCC)	19996202	5	Y
B	88	c.264G>C	p.Trp88Cys	1	Papillary renal cell carcinoma (RCC)	15932632	5	Y
B	88	c.264G>T	p.Trp88Cys	1	clear cell renal cell carcinoma (ccRCC)	21715564	5	Y
B	88		p.Trp88Cys	1	clear cell renal cell carcinoma (RCC)	19755989	5	Y
B	88	c.262T>G	p.Trp88Gly	1	Clear cell renal cell carcinoma (ccRCC)	28853079	5	Y
B	88	c.263G>T	p.Trp88Leu	1	renal cell carcinoma (RCC). Tumor no. 9	7977367	5	Y
B	88	c.263G>T	p.Trp88Leu	1	clear cell renal cell carcinoma (RCC)	24727139	5	Y
B	88	c.263G>T	p.Trp88Leu	1	clear cell renal cell carcinoma (RCC)	24166983	5	Y
B	88	c.263G>T	p.Trp88Leu	1	Clear cell renal cell carcinoma (ccRCC)	28853079	5	Y
B	88	c.263G>C	p.Trp88Ser	1	Von Hippel-Lindau syndrome Type 1: renal cell carcinoma (RCC)	8634692	5	Y
B	88	c.263G>C	p.Trp88Ser	1	Renal phenotype	15300849	5	Y
B	88	c.263G>C	p.Trp88Ser	1	RCC	20054297	5	Y
B	89	c.266T>G	p.Leu89Arg	1	clear cell / granular cell renal cell carcinoma (RCC)	7915601	5	Y
B	89	c.266T>G	p.Leu89Arg	1	clear cell renal cell carcinoma (ccRCC)	21715564	5	Y
B	89	c.266T>G	p.Leu89Arg	1	clear cell renal cell carcinoma (RCC)	16488999	5	Y
B	89	c.266T>A	p.Leu89His	1	renal cell carcinoma (RCC)	7915601	5	Y
B	89	c.266T>A	p.Leu89His	2	renal cell carcinoma (RCC)	11505222	5	Y
B	89	c.266T>A	p.Leu89His	1	renal cell carcinoma (RCC) after trichloroethylene exposure [Patient 1698]	10340905	5	Y
B	89	c.266T>A	p.Leu89His	1	clear cell renal cell carcinoma (ccRCC)	21715564	5	Y
B	89	c.266T>A	p.Leu89His	1	clear cell renal cell carcinoma (RCC)	12781449	5	Y
B	89	c.266T>A	p.Leu89His	1	clear cell renal cell carcinoma (RCC)	24727139	5	Y
B	89	c.266T>A	p.Leu89His	1	clear cell renal cell carcinoma (RCC)	10454237	5	Y
B	89	c.266T>A	p.Leu89His	1	clear cell renal cell carcinoma (RCC)	24166983	5	Y
B	89	c.266T>A	p.Leu89His	1	clear cell renal cell carcinoma (RCC)	11921283	5	Y
B	89	T>A	p.Leu89His	1	clear cell renal cell carcinoma (RCC)	23036577	5	Y
B	89	c.266T>A	p.Leu89His	1	renal cell carcinoma (RCC)	11536052	5	Y
B	89	c.266T>A	p.Leu89His	1	clear cell renal cell carcinoma (RCC) with occupational TCE exposure	15177666	5	Y
B	89	c.266T>C	p.Leu89Pro	1	renal cell carcinoma (RCC)	11505222	5	Y
B	89	c.265T>C	p.Leu89Pro	1	clear cell renal cell carcinoma (RCC)	11793370	5	Y
B	90	c.269A>T	p.Asn90Ile	1	clear cell renal cell carcinoma (RCC)	7915601	5	Y
B	90	c.269A>T	p.Asn90Ile	1	Von Hippel-Lindau syndrome Type 1: renal cell carcinoma (RCC)	10761708	5	Y
B	90	c.269A>T	p.Asn90Ile	1	clear cell renal cell carcinoma (RCC)	24727139	5	Y
B	90	c.269A>T	p.Asn90Ile	1	clear cell renal cell carcinoma (RCC)	24166983	5	Y
B	90	A>T	p.Asn90Ile	1	clear cell renal cell carcinoma (RCC)	23036577	5	Y
B	90	c.269A>T	p.Asn90Ile	1	RCC	20054297	5	Y
B	90	c.269A>T	p.Asn90Ile	1	clear cell renal cell carcinoma (RCC)	19996202	5	Y
B	90	c.268A>T	p.Asn90Tyr	1	renal cell carcinoma (RCC)	7881415	5	Y
B	90	c.268A>T	p.Asn90Tyr	1	clear cell renal cell carcinoma (RCC)	24727139	5	Y
B	91	c.273C>G	p.Phe91Leu	1	Renal phenotype	15300849	5	Y
B	91	c.273G>A	p.Phe91Leu	1	clear cell renal cell carcinoma (ccRCC)	21715564	5	Y
B	91	c.271T>C	p.Phe91Leu	1	clear cell renal cell carcinoma (RCC) without occupational TCE exposure	15177666	5	Y
B	92	c.274G>A	p.Asp92Asn	1	clear cell renal cell carcinoma (RCC)	9143408	5	Y
B	92	c.274G>T	p.Asp92Tyr	1	clear cell renal cell carcinoma (RCC)	15932632	5	Y
B	93		p.Gly93Arg	1	clear cell renal cell carcinoma (RCC)	19755989	5	Y
B	93	c.278G>A	p.Gly93Asp	1	clear cell renal cell carcinoma (ccRCC)	21715564	5	Y
B	93	c.279C>G	p.Gly93Glu	1	clear cell renal cell carcinoma (ccRCC)	21715564	5	Y
B	94	c.280G>A	p.Glu94Lys	1	clear cell renal cell carcinoma (RCC)	24727139	5	Y
B, D	95.51	c.284C>G & 151G>C	p.Pro95Arg & p.Glu51Gln	1	clear cell renal cell carcinoma (RCC)	15932632	5	Y
B	96	c.288G>T	p.Gln96His	1	clear cell renal cell carcinoma (RCC)	15932632	5	Y
B	97	c.290C>T	p.Pro97Leu	1	Renal phenotype	15300849	5	Y
B, D	97.39	c.291C>A & 115G>A	p.Pro97Pro & p.Gly39Ser	1	clear cell renal cell carcinoma (RCC)	15932632	5	Y
B	98	c.292T>A	p.Tyr98Asn	1	clear cell / granular cell /sarcomatoid renal cell carcinoma (RCC)	7915601	5	Y
B	98	c.292T>A	p.Tyr98Asn	1	clear cell renal cell carcinoma (ccRCC)	21715564	5	Y
B	98	c.292T>G	p.Tyr98Asp	1	renal cell carcinoma (RCC)	10766184	5	Y
B	98	c.292T>C	p.Tyr98His	1	Renal phenotype	15300849	5	Y
B	98	c.292T>C	p.Tyr98His	1	renal cell carcinoma (RCC). Pedigree no. 14	7977367	5	Y
B	98	c.292T>C	p.Tyr98His	1	renal cell carcinoma (RCC). Pedigree no. 15	7977367	5	Y
B	98	c.293A>T	p.Tyr98Phe	1	clear cell renal cell carcinoma (RCC)	11921283	5	Y
B	98	c.293A>T	p.Tyr98Phe	1	Clear cell renal cell carcinoma (ccRCC)	28853079	5	Y
B	100	c.298A>G	p.Thr100Ala	1	Clear cell renal cell carcinoma (RCC)	7591282	5	Y
B	101	c.301C>T	p.Leu101Leu	1	clear cell renal cell carcinoma (RCC)	15932632	5	Y
B	101	c.302T>C	p.Leu101Pro	1	clear cell renal cell carcinoma (ccRCC)	21715564	5	Y
B	101	c.302T>C	p.Leu101Pro	1	clear cell renal cell carcinoma (RCC)	16488999	5	Y
B	101	c.302T>C	p.Leu101Pro	1	Clear cell renal cell carcinoma (ccRCC)	28853079	5	Y
B	101	c.302T>C	p.Leu101Pro	1	clear cell renal cell carcinoma (RCC)	19996202	5	Y
B	102	c.304C>G & 444delT	p.Pro102Ala & Stop at 158	1	clear cell renal cell carcinoma (RCC)	15932632	5	Y
B	102	c.444delT & 304C>G	Stop at 158 & p.Pro102Ala	1	clear cell renal cell carcinoma (RCC)	15932632	5	Y
C	105	c.314C>T	p.Thr105Met	1	clear cell renal cell carcinoma (RCC)	15932632	5	Y
C	105	c.313A>C	p.Thr105Pro	1	Clear cell renal cell carcinoma (RCC)	10408776	5	Y
C	105	c.313A>C	p.Thr105Pro	1	Renal phenotype	15300849	5	Y
C	105	c.313A>C	p.Thr105Pro	1	renal cell carcinoma (RCC)	11505222	5	Y
C	106	c.317G>C	p.Gly106Ala	1	clear cell renal cell carcinoma (RCC)	9143408	5	Y
C	107	c.320G>A	p.Arg107His	1	Renal phenotype	15300849	5	Y
C	107	c.320_321delinsCA	p.Arg107Pro	1	clear cell renal cell carcinoma (RCC)	19996202	5	Y
C	109	c.326T>A	p.Ile109Asn	1	clear cell renal cell carcinoma (RCC)	24166983	5	Y
C	109	c.326T>G	p.Ile109Ser	1	clear cell renal cell carcinoma (RCC)	23036577	5	Y
C	110	c.328C>A	p.His110Asn	1	clear cell renal cell carcinoma (RCC)	24166983	5	Y
C	110	c.330C>G	p.His110Gln	1	clear cell renal cell carcinoma (RCC)	12781449	5	Y
C	110	c.329A>C	p.His110Pro	1	clear cell renal cell carcinoma (RCC)	24504440	5	Y
C	110	c.329A>C	p.His110Pro	1	RCC	20054297	5	Y
C	111	c.331A>C	p.Ser111Arg	1	clear cell renal cell carcinoma (RCC)	24727139	5	Y
C	111	c.331A>C	p.Ser111Arg	1	clear cell renal cell carcinoma (RCC)	24727139	5	Y
C	111	c.333C>A	p.Ser111Arg	1	clear cell renal cell carcinoma (ccRCC)	21715564	5	Y
C	111	c.333C>G	p.Ser111Arg	1	clear cell renal cell carcinoma (RCC)	24727139	5	Y
C	111	c.333C>G	p.Ser111Arg	1	clear cell renal cell carcinoma (RCC)	24166983	5	Y
C	111	c.333C>G	p.Ser111Arg	1	clear cell renal cell carcinoma (RCC)	11921283	5	Y
C	111	c.332G>A	p.Ser111Asn	1	renal cell carcinoma (RCC): No trichloroethylene exposure, but does have exposure to cutting oils in screw cutting industry	17997830	5	Y
C	111	c.332G>A	p.Ser111Asn	1	clear cell renal cell carcinoma (RCC)	24166983	5	Y
C	111	c.332G>A	p.Ser111Asn	1	Clear cell renal cell carcinoma (ccRCC)	28853079	5	Y
C	111	c.331A>T	p.Ser111Cys	1	Renal phenotype	15300849	5	Y
C	111	c.331A>G	p.Ser111Gly	1	renal cell carcinoma (RCC). Tumor no. 19	7977367	5	Y
C	111	c.331A>G	p.Ser111Gly	1	clear cell renal cell carcinoma (RCC)	24166983	5	Y
C	111	c.331A>G	p.Ser111Gly	1	clear cell renal cell carcinoma (RCC)	19996202	5	Y
C	111	c.332G>T	p.Ser111Ile	1	clear cell renal cell carcinoma (RCC)	24166983	5	Y
C	111	c.332G>T	p.Ser111Ile	1	clear cell renal cell carcinoma (RCC)	19996202	5	Y
C	112	c.334T>G	p.Tyr112Asp	1	clear cell renal cell carcinoma (RCC)	15932632	5	Y
C	112	c.334T>G	p.Tyr112Asp	1	clear cell renal cell carcinoma (ccRCC)	21715564	5	Y
C	114	c.341G>C	p.Gly114Ala	1	clear cell renal cell carcinoma (RCC)	23797736	5	Y
C	114	c.340G>C	p.Gly114Arg	1	renal cell carcinoma (RCC)	Gallou et al. vedi paper Nordstrom 20151405	5	Y
C	114	c.340G>C	p.Gly114Arg	1	Von Hippel-Lindau syndrome Type 2B: clear cell renal cell carcinoma (ccRCC)	21715564	5	Y
C	114	c.340G>C	p.Gly114Arg	1	Clear cell renal cell carcinoma (ccRCC)	28853079	5	Y
C	114		p.Gly114Arg	1	clear cell renal cell carcinoma (RCC)	19755989	5	Y
C	114	c.340G>C	p.Gly114Arg	1	renal cell carcinoma (RCC)	11505222	5	Y
C	114	c.340G>C	p.Gly114Arg	1	RCC	20054297	5	Y
C	114	c.340G>C	p.Gly114Arg	1	clear cell renal cell carcinoma (RCC)	19996202	5	Y
C	114	c.341G>A	p.Gly114Asp	1	clear cell renal cell carcinoma (ccRCC)	21715564	5	Y
C	114	c.341G>C	p.Gly114Asp	1	clear cell renal cell carcinoma (RCC)	16488999	5	Y
C	114	c.340G>T	p.Gly114Cys	1	renal cell carcinoma (RCC)	11505222	5	Y
C	114	c.340G>T	p.Gly114Cys	1	clear cell renal cell carcinoma (RCC)	15932632	5	Y
C	114	c.340G>T	p.Gly114Cys	1	clear cell renal cell carcinoma (RCC)	24727139	5	Y
C	114	c.340G>T	p.Gly114Cys	1	clear cell renal cell carcinoma (RCC)	11921283	5	Y
C	114	c.340G>T	p.Gly114Cys	1	renal cell carcinoma (RCC)	7881415	5	Y
C	114	c.340G>A	p.Gly114Ser	1	clear cell renal cell carcinoma (RCC)	7915601	5	Y
C	114	c.340G>A & 340+2T>G	p.Gly114Ser & Splice	1	clear cell renal cell carcinoma (RCC)	15932632	5	Y
C	115	c.343C>A	p.His115Asn	1	clear cell renal cell carcinoma (RCC)	15932632	5	Y
C	115	c.343C>A	p.His115Asn	1	clear cell renal cell carcinoma (ccRCC)	21715564	5	Y
C	115	c.343C>A	p.His115Asn	1	clear cell renal cell carcinoma (RCC)	24166983	5	Y
C	115	c.343C>A	p.His115Asn	1	clear cell renal cell carcinoma (RCC)	16488999	5	Y
C	115	C>A	p.His115Asn	1	clear cell renal cell carcinoma (RCC)	23036577	5	Y
C	115		p.His115Asn	1	clear cell renal cell carcinoma (RCC)	19755989	5	Y
C	115		p.His115Asn	1	clear cell renal cell carcinoma (RCC)	19755989	5	Y
C	115	c.343C>G	p.His115Asp	1	clear cell renal cell carcinoma (RCC)	16488999	5	Y
C	115	c.345C>A	p.His115Gln	1	clear cell renal cell carcinoma (RCC)	23797736	5	Y
C	115	c.345C>G	p.His115Gln	1	Renal phenotype	15300849	5	Y
C	115	c.344A>T	p.His115Leu	1	clear cell renal cell carcinoma (ccRCC)	21715564	5	Y
C	115	c.344A>C	p.His115Pro	1	clear cell renal cell carcinoma (RCC)	10766184	5	Y
C	115	c.343C>T	p.His115Tyr	1	renal cell carcinoma (RCC)	10326868	5	Y
C	115	c.343C>T	p.His115Tyr	1	renal cell carcinoma (RCC)	20151405	5	Y
C	115	c.343C>T	p.His115Tyr	1	renal cell carcinoma (RCC)	7915601	5	Y
C	115	c.343C>T	p.His115Tyr	1	clear cell renal cell carcinoma (ccRCC)	21715564	5	Y
C	115	c.343C>T	p.His115Tyr	1	renal cell carcinoma (RCC)	24727139	5	Y
C	115	c.343C>T	p.His115Tyr	1	clear cell renal cell carcinoma (RCC)	24166983	5	Y
C	115	c.343C>T	p.His115Tyr	1	clear cell renal cell carcinoma (RCC)	23797736	5	Y
C	115	c.343C>T	p.His115Tyr	1	Renal phenotype	15300849	5	Y
C	115	c.343C>T	p.His115Tyr	1	clear cell renal cell carcinoma (RCC)	10766184	5	Y
C	115	c.343C>T	p.His115Tyr	1	renal cell carcinoma (RCC)	7881415	5	Y
C	115	c.343C>T	p.His115Tyr	1	clear cell renal cell carcinoma (RCC)	23036577	5	Y
C	116	c.346C>G	p.Leu116Val	1	Clear cell renal cell carcinoma (RCC)	10408776	5	Y
C	116	c.346C>G	p.Leu116Val	1	renal cell carcinoma (RCC)	11505222	5	Y
C	117	c.350T>C	p.Leu117Pro	1	clear cell renal cell carcinoma (RCC)	24504440	5	Y
C	117	c.349T>A	p.Trp117Arg	1	clear cell renal cell carcinoma (RCC)	7915601	5	Y
C	117	c.349T>C	p.Trp117Arg	1	clear cell renal cell carcinoma (ccRCC)	21715564	5	Y
C	117		p.Trp117Arg	1	clear cell renal cell carcinoma (RCC)	19755989	5	Y
C	117	c.349T>C	p.Trp117Arg	1	clear cell renal cell carcinoma (RCC)	19996202	5	Y
C	117	c.351G>C	p.Trp117Cys	1	clear cell renal cell carcinoma (RCC)	24166983	5	Y
C	117	c.351G>T	p.Trp117Cys	1	Von Hippel-Lindau syndrome Type 1: clear cell renal cell carcinoma (ccRCC)	21715564	5	Y
C	117	c.351G>T	p.Trp117Cys	1	Renal phenotype	15300849	5	Y
C	117	c.349T>G	p.Trp117Gly	1	clear cell renal cell carcinoma (RCC)	22461374	5	Y
C	117	c.350G>T	p.Trp117Leu	1	clear cell renal cell carcinoma (ccRCC)	21715564	5	Y
C	117	c.350G>T	p.Trp117Leu	1	clear cell renal cell carcinoma (RCC)	16488999	5	Y
C	117	G>T	p.Trp117Leu	1	clear cell renal cell carcinoma (RCC)	23036577	5	Y
C	117	c.350G>C	p.Trp117Ser	1	clear cell renal cell carcinoma (ccRCC)	21715564	5	Y
C	118	c.353T>C	p.Leu118Pro	1	clear cell / granular cell renal cell carcinoma (RCC)	7915601	5	Y
C	118	c.353T>C	p.Leu118Pro	1	clear cell renal cell carcinoma (RCC)	15932632	5	Y
C	118	c.353T>C	p.Leu118Pro	1	renal cell carcinoma (RCC)	vedi paper Nordstrom 20151405	5	Y
C	118	c.353T>C	p.Leu118Pro	1	clear cell renal cell carcinoma (RCC)	23797736	5	Y
C	118	c.353T>C	p.Leu118Pro	1	Renal phenotype	15300849	5	Y
C	118	c.353T>C	p.Leu118Pro	1	Von Hippel-Lindau syndrome Type 1: renal cell carcinoma (RCC)	8634692	5	Y
C	118	c.353T>C	p.Leu118Pro	1	Clear cell renal cell carcinoma (ccRCC)	28853079	5	Y
C	118	c.353T>C	p.Leu118Pro	1	clear cell renal cell carcinoma (RCC)	11793370	5	Y
A	118	c.353T>C	p.Leu118Pro	1	clear cell renal cell carcinoma (RCC)	24727139	5	Y
C	119	c.355T>C	p.Phe119Leu	1	clear cell renal cell carcinoma (RCC)	23797736	5	Y
C	119	c.357C>A	p.Phe119Leu	1	clear cell renal cell carcinoma (ccRCC)	21715564	5	Y
C	119	c.357C>G	p.Phe119Leu	2	clear cell renal cell carcinoma (RCC) with occupational TCE exposure	15177666	5	Y
C	121	c.363T>G	p.Asp121Glu	1	renal cell carcinoma (RCC)	7881415	5	Y
C	121	c.362A>G	p.Asp121Gly	1	renal cell carcinoma (RCC). Pedigree no. 21	7977367	5	Y
C	121	c.362A>G	p.Asp121Gly	1	clear cell renal cell carcinoma (ccRCC)	21715564	5	Y
C	121	c.362A>G	p.Asp121Gly	1	clear cell renal cell carcinoma (RCC)	23797736	5	Y
C	121	c.362A>G	p.Asp121Gly	1	Renal phenotype	15300849	5	Y
C	121	c.362A>G	p.Asp121Gly	1	renal cell carcinoma (RCC)	11051223	5	Y
C	121	c.361G>T	p.Asp121Tyr	1	clear cell renal cell carcinoma (ccRCC)	21715564	5	Y
C	121	c.361G>T	p.Asp121Tyr	1	clear cell renal cell carcinoma (RCC)	23797736	5	Y
C	121	c.361G>T	p.Asp121Tyr	1	clear cell renal cell carcinoma (RCC)	23797736	5	Y
C	121	G>T	p.Asp121Tyr	1	clear cell renal cell carcinoma (RCC)	23036577	5	Y
C	121	c.361G>T	p.Asp121Tyr	1	clear cell renal cell carcinoma (RCC)	19996202	5	Y
C	121	c.362A>T	p.Asp121Val	1	clear cell renal cell carcinoma (RCC)	23797736	5	Y
C	122	c.365C>A	p.Ala122Glu	1	clear cell renal cell carcinoma (RCC)	10766184	5	Y
C	122	c.365C>A	p.Ala122Glu	1	clear cell renal cell carcinoma (RCC)	10766184	5	Y
C	124	c.370A>G	p.Thr124Ala	1	clear cell renal cell carcinoma (ccRCC)	21715564	5	Y
C	125	c.374A>T	p.His125Leu	1	clear cell renal cell carcinoma (RCC)	23797736	5	Y
C	126	c.376G>A	p.Asp126Asn	1	clear cell renal cell carcinoma (RCC) without occupational TCE exposure	15177666	5	Y
C	126	c.377A>G	p.Asp126Gly	1	clear cell / granular cell renal cell carcinoma (RCC)	7915601	5	Y
C	128	c.383T>G	p.Leu128Arg	1	clear cell renal cell carcinoma (RCC)	24727139	5	Y
C	128	c.383T>G	p.Leu128Arg	1	clear cell renal cell carcinoma (RCC)	10454237	5	Y
C	128	c.383T>G	p.Leu128Arg	1	clear cell renal cell carcinoma (RCC)	11793370	5	Y
C	128	c.383T>G	p.Leu128Arg	1	renal cell carcinoma (RCC)	11536052	5	Y
C	128	c.383T>A	p.Leu128His	1	clear cell renal cell carcinoma (RCC)	15932632	5	Y
C	128	c.383T>A	p.Leu128His	1	clear cell renal cell carcinoma (ccRCC)	21715564	5	Y
C	128	c.382C>A	p.Leu128Ile	1	clear cell renal cell carcinoma (RCC)	11921283	5	Y
C	128	c.382C>A	p.Leu128Ile	1	clear cell renal cell carcinoma (RCC)	11921283	5	Y
C	128	c.383T>C	p.Leu128Pro	1	clear cell renal cell carcinoma (RCC)	24727139	5	Y
C	128	c.383T>C	p.Leu128Pro	1	clear cell renal cell carcinoma (RCC)	24471421	5	Y
C	128	c.383T>C	p.Leu128Pro	1	clear cell renal cell carcinoma (RCC)	24166983	5	Y
C	129	c.385C>A	p.Leu129Met	1	clear cell renal cell carcinoma (RCC)	24471421	5	Y
C	130	c.388G>C	p.Phe130Leu	2	renal cell carcinoma (RCC)	8187067	5	Y
C	130	c.389T>A	p.Val130Asp	1	clear cell renal cell carcinoma (ccRCC)	21715564	5	Y
C	130	c.388G>C	p.Val130Leu	1	clear cell renal cell carcinoma (RCC)	24727139	5	Y
C	130	c.388G>C	p.Val130Leu	1	clear cell renal cell carcinoma (RCC)	11921283	5	Y
C	130	c.388G>C	p.Val130Leu	1	clear cell renal cell carcinoma (RCC)	23797736	5	Y
C	130	c.388G>C	p.Val130Leu	1	Renal phenotype	15300849	5	Y
C	130	c.388G>C	p.Val130Leu	1	clear cell renal cell carcinoma (RCC)	19996202	5	Y
C	130	c.388G>C	p.Val130Leu	1	renal cell carcinoma (RCC)	7915601	5	Y
C	130	c.388G>T	p.Val130Phe	1	clear cell renal cell carcinoma (ccRCC)	21715564	5	Y
C	130	c.388G>T	p.Val130Phe	1	Clear cell renal cell carcinoma (ccRCC)	28853079	5	Y
C	131	c.392A>T	p.Asn131Ile	1	Clear cell renal cell carcinoma (ccRCC)	28853079	5	Y
C	131	c.393C>A	p.Asn131Lys	1	clear cell renal cell carcinoma (RCC)	24166983	5	Y
C	131	c.393C>A	p.Asn131Lys	1	Renal phenotype	15300849	5	Y
C	131	c.391A>T	p.Asn131Tyr	1	clear cell renal cell carcinoma (RCC)	15932632	5	Y
C	131	c.391A>T	p.Asn131Tyr	1	clear cell renal cell carcinoma (RCC)	24727139	5	Y
C	131	c.391A>T	p.Asn131Tyr	1	clear cell renal cell carcinoma (RCC)	23797736	5	Y
C	132	c.395A>C	p.Gln132Pro	1	clear cell renal cell carcinoma (ccRCC)	21715564	5	Y
C	132	c.395A>C	p.Gln132Pro	1	Renal phenotype	15300849	5	Y
C	133	c.397A>T	p.Thr133Ser	1	renal cell carcinoma (RCC)	7881415	5	Y
C	134	c.401A>C	p.Glu134Ala	1	clear cell renal cell carcinoma (RCC)	11921283	5	Y
C	136	c.407T>G	p.Phe136Cys	1	renal cell carcinoma (RCC). Pedigree no. 10	7977367	5	Y
C	136	c.407T>G	p.Phe136Cys	1	clear cell renal cell carcinoma (RCC)	10766184	5	Y
C	136	c.406T>A	p.Phe136Ile	1	renal cell carcinoma (RCC)	8187067	5	Y
C	136	c.406T>A	p.Phe136Ile	1	clear cell renal cell carcinoma (RCC)	11921283	5	Y
C	136	c.408T>G	p.Phe136Leu	1	clear cell renal cell carcinoma (RCC)	15932632	5	Y
C	136	c.407T>C	p.Phe136Ser	1	renal cell carcinoma (RCC)	20151405	5	Y
C	136	c.407T>C	p.Phe136Ser	1	clear cell renal cell carcinoma (RCC)	10454237	5	Y
C	136	c.407T>C	p.Phe136Ser	1	Renal phenotype	15300849	5	Y
C	136	T>C	p.Phe136Ser	1	clear cell renal cell carcinoma (RCC)	23036577	5	Y
C	136	c.407T>C	p.Phe136Ser	1	renal cell carcinoma (RCC)	11536052	5	Y
C	136	c.407T>A	p.Phe136Tyr	1	Clear cell renal cell carcinoma (RCC)	10408776	5	Y
C	136	c.407T>A	p.Phe136Tyr	1	renal cell carcinoma (RCC)	11505222	5	Y
C	136	c.406T>G	p.Phe136Val	1	clear cell renal cell carcinoma (RCC)	16488999	5	Y
C	136	c.406T>G	p.Phe136Val	1	clear cell renal cell carcinoma (RCC)	16488999	5	Y
C	136	c.406T>G	p.Phe136Val	1	RCC	20054297	5	Y
C	137	c.409G>A	p.Val137Met	1	clear cell renal cell carcinoma (RCC)	24471421	5	Y
C	138	c.413C>G	p.Pro138Arg	1	clear cell / granular cell renal cell carcinoma (RCC)	7915601	5	Y
C	138	c.413C>G	p.Pro138Arg	1	clear cell renal cell carcinoma (RCC)	19996202	5	Y
C	141	c.422A>G	p.Asn141Ser	1	clear cell renal cell carcinoma (RCC)	24727139	5	Y
C	143	c.429C>G	p.Asp143Glu	1	renal cell carcinoma (RCC)	10766184	5	Y
C	144	G>A	p.Gly144Asp	1	clear cell renal cell carcinoma (RCC)	23036577	5	Y
C	145	c.435G>T	p.Gln145His	1	renal cell carcinoma (RCC)	11505222	5	Y
C	145	c.435G>T	p.Gln145His	1	Clear cell renal cell carcinoma (RCC)	10408776	5	Y
C	146	c.436C>G	p.Pro146Ala	1	clear cell renal cell carcinoma (RCC)	19755989	5	Y
C	149	c.446C>A	p.Ala149Asp	1	clear cell renal cell carcinoma (RCC)	19996202	5	Y
C	149	c.445G>C	p.Ala149Pro	1	renal cell carcinoma (RCC)	7881415	5	Y
C	149	c.445G>T	p.Ala149Ser	1	V-4: female; RCC	9435426	5	Y
C	149	c.445G>A	p.Ala149Thr	1	Renal phenotype	15300849	5	Y
C	151	c.452T>A	p.Ile151Asn	1	clear cell renal cell carcinoma (RCC)	24166983	5	Y
C	151	c.452T>A	p.Ile151Asn	1	clear cell renal cell carcinoma (RCC)	16488999	5	Y
C	151	c.450_451insTAT	p.Ile151dup	1	Clear cell renal cell carcinoma (ccRCC)	28853079	5	Y
C	151	c.452T>G	p.Ile151His	1	clear cell renal cell carcinoma (RCC)	11921283	5	Y
C	151	c.453C>G	p.Ile151Met	1	renal cell carcinoma (RCC). Tumor no. 11	7977367	5	Y
C	151	c.451A>T	p.Ile151Phe	1	clear cell renal cell carcinoma (RCC)	10766184	5	Y
C	151	c.452T>G	p.Ile151Ser	1	clear cell renal cell carcinoma (RCC)	7915601	5	Y
C	151	c.452T>G	p.Ile151Ser	1	clear cell / granular cell /sarcomatoid renal cell carcinoma (RCC)	7915601	5	Y
C	151	c.452T>G	p.Ile151Ser	1	renal cell carcinoma (RCC)	7915601	5	Y
C	151	c.452T>G	p.Ile151Ser	1	Clear cell renal cell carcinoma (RCC)	7591282	5	Y
C	151	c.452T>G	p.Ile151Ser	1	clear cell renal cell carcinoma (ccRCC)	21715564	5	Y
C	151	c.452T>G	p.Ile151Ser	1	clear cell renal cell carcinoma (RCC)	10766184	5	Y
C	151		p.Ile151Ser	1	clear cell renal cell carcinoma (RCC)	19755989	5	Y
C	151	c.452T>G	p.Ile151Ser	1	RCC	20054297	5	Y
C	151	c.452T>C	p.Ile151Thr	1	clear cell renal cell carcinoma (ccRCC)	21715564	5	Y
C	151	c.452T>C	p.Ile151Thr	1	clear cell renal cell carcinoma (RCC)	23036577	5	Y
C	151	c.452T>C	p.Ile151Thr	1	clear cell renal cell carcinoma (RCC)	24504440	5	Y
C	153	c.458T>G	p.Leu153Arg	1	clear cell renal cell carcinoma (RCC)	24166983	5	Y
C	153	c.458T>C	p.Leu153Pro	1	clear cell / granular cell renal cell carcinoma (RCC)	7915601	5	Y
C	153	c.458T>C	p.Leu153Pro	1	clear cell renal cell carcinoma (ccRCC)	21715564	5	Y
C	153	c.458T>C	p.Leu153Pro	1	clear cell renal cell carcinoma (RCC)	11793370	5	Y
A	154	c.461C>T	p.Pro154Leu	1	renal cell carcinoma (RCC). Pedigree no. 18	7977367	5	Y
A	154	c.461C>T	p.Pro154Leu	1	clear cell renal cell carcinoma (RCC)	24471421	5	Y
A	154	c.461C>T	p.Pro154Leu	1	clear cell renal cell carcinoma (RCC)	16488999	5	Y
A	155		p.Val155Asp	1	renal cell carcinoma (RCC)	11967908	5	Y
A	155		p.Val155Gly	1	renal cell carcinoma (RCC)	11967908	5	Y
A	155	c.463G>C	p.Val155Leu	1	Renal phenotype	15300849	5	Y
A	155	G>C	p.Val155Leu	1	clear cell renal cell carcinoma (RCC)	23036577	5	Y
A	155		p.Val155Leu	1	clear cell renal cell carcinoma (RCC)	19755989	5	Y
A	155	c.463G>A	p.Val155Met	1	renal cell carcinoma (RCC)	11505222	5	Y
A	155	c.463G>A	p.Val155Met	1	renal cell carcinoma (RCC)	Gallou et al. vedi paper Nordstrom 20151405	5	Y
A	155	G>A	p.Val155Met	1	clear cell renal cell carcinoma (RCC)	23036577	5	Y
A	156	c.466T>G	p.Tyr156Asp	1	renal cell carcinoma (RCC)	11967908	5	Y
A	156	c.466T>G	p.Tyr156Asp	1	Renal phenotype	15300849	5	Y
A	156	c.467A>G	p.Tyr156Cys	1	Renal phenotype	15300849	5	Y
A	157	c.470C>T	p.Thr157Ile	1	renal cell carcinoma (RCC) after trichloroethylene exposure [Patient 1660]	10340905	5	Y
A	157	c.470C>T	p.Thr157Ile	1	clear cell renal cell carcinoma (RCC)	24166983	5	Y
A	157	c.470C>T	p.Thr157Ile	1	clear cell renal cell carcinoma (RCC)	23797736	5	Y
A	157	c.470C>T	p.Thr157Ile	1	Renal phenotype	15300849	5	Y
A	158	c.473T>G	p.Leu158Arg	1	Papillary RCC	24727139	5	Y
A	158	c.473T>G	p.Leu158Arg	1	clear cell renal cell carcinoma (RCC)	24166983	5	Y
A	158	c.473T>A	p.Leu158Gln	1	clear cell renal cell carcinoma (RCC)	9143408	5	Y
A	158	c.473T>A	p.Leu158Gln	1	clear cell renal cell carcinoma (RCC)	24727139	5	Y
A	158	c.473T>A	p.Leu158Gln	1	clear cell renal cell carcinoma (RCC)	11921283	5	Y
A	158	c.473T>A	p.Leu158Gln	1	clear cell renal cell carcinoma (RCC)	10766184	5	Y
A	158	c.473T>A	p.Leu158Gln	1	clear cell renal cell carcinoma (RCC)	10766184	5	Y
A	158	c.473T>A	p.Leu158Gln	1	clear cell renal cell carcinoma (RCC)	16488999	5	Y
A	158	c.473T>A	p.Leu158Gln	1	clear cell renal cell carcinoma (RCC)	11793370	5	Y
A	158	c.473T>A	p.Leu158Gln	1	clear cell renal cell carcinoma (RCC)	19996202	5	Y
A	158	c.473T>C	p.Leu158Pro	1	clear cell / granular cell /sarcomatoid renal cell carcinoma (RCC)	7915601	5	Y
A	158	c.473T>C	p.Leu158Pro	1	renal cell carcinoma (RCC). Pedigree no. 1	7977367	5	Y
A	158	c.473T>C	p.Leu158Pro	2	renal cell carcinoma (RCC)	Gnarra 1994/ Brieger 1999 et al. vedi paper Nordstrom 20151405	5	Y
A	158	c.473T>C	p.Leu158Pro	1	Renal phenotype	15300849	5	Y
A	158	c.473T>C	p.Leu158Pro	1	clear cell renal cell carcinoma (RCC)	10766184	5	Y
A	158	c.473T>C	p.Leu158Pro	1	renal cell carcinoma (RCC). Pedigree no. 2	7977367	5	Y
A	158		p.Leu158Pro	1	clear cell renal cell carcinoma (RCC)	19755989	5	Y
A	158	c.472C>G	p.Leu158Val	1	clear cell renal cell carcinoma (RCC)	15932632	5	Y
A	158	c.472C>G	p.Leu158Val	1	renal cell carcinoma (RCC)	11505222	5	Y
A	158	c.472C>G	p.Leu158Val	1	Von Hippel-Lindau syndrome Type 1: clear cell renal cell carcinoma (ccRCC)	21715564	5	Y
A	158	c.472C>G	p.Leu158Val	1	clear cell renal cell carcinoma (RCC)	24166983	5	Y
A	158	c.472C>G	p.Leu158Val	1	clear cell renal cell carcinoma (RCC)	11921283	5	Y
A	158	c.472C>G	p.Leu158Val	1	clear cell renal cell carcinoma (RCC)	23797736	5	Y
A	158		p.Leu158Val	1	clear cell renal cell carcinoma (RCC)	28052007	5	Y
A	158	c.472C>G	p.Leu158Val	1	Clear cell renal cell carcinoma (ccRCC)	28853079	5	Y
A	158	C>G	p.Leu158Val	1	clear cell renal cell carcinoma (RCC)	23036577	5	Y
A	158	c.472C>G	p.Leu158Val	1	RCC	20054297	5	Y
A	159	c.477A>T	p.Lys159Asn	1	clear cell renal cell carcinoma (ccRCC)	21715564	5	Y
A	160	c.478G>A	p.Glu160Lys	4	renal cell carcinoma (RCC)	11536052	5	Y
A	160	c.478G>A	p.Glu160Lys	1	clear cell renal cell carcinoma (RCC)	24727139	5	Y
A	161	c.482G>A	p.Arg161Gln	1	clear cell renal cell carcinoma (ccRCC)	21715564	5	Y
A	161	c.482G>A	p.Arg161Gln	1	Renal phenotype	15300849	5	Y
A	161		p.Arg161Gln	1	clear cell renal cell carcinoma (RCC)	28052007	5	Y
A	161	c.482G>C	p.Arg161Pro	1	renal cell carcinoma (RCC)	20151405	5	Y
A	161	c.482G>C	p.Arg161Pro	1	clear cell renal cell carcinoma (ccRCC)	21715564	5	Y
A	161	c.482G>C	p.Arg161Pro	1	clear cell renal cell carcinoma (RCC)	24166983	5	Y
A	161	c.482G>C	p.Arg161Pro	1	clear cell renal cell carcinoma (RCC)	11921283	5	Y
A	161	c.482G>C	p.Arg161Pro	1	clear cell renal cell carcinoma (RCC)	28052007	5	Y
A	162		p.Cys162Arg	1	clear cell renal cell carcinoma (RCC)	28052007	5	Y
A	162	c.484T>C	p.Cys162Arg	1	renal cell carcinoma (RCC)	11536052	5	Y
A	162	c.484T>C	p.Cys162Arg	2	renal cell carcinoma (RCC)	11505222	5	Y
A	162	c.485G>T	p.Cys162Phe	1	RCC	20054297	5	Y
A	162	c.486C>G	p.Cys162Trp	1	Renal phenotype	15300849	5	Y
A	162	C>G	p.Cys162Trp	1	clear cell renal cell carcinoma (RCC)	23036577	5	Y
A	162		p.Cys162Trp	1	clear cell renal cell carcinoma (RCC)	19755989	5	Y
A	162	c.486C>G	p.Cys162Trp	1	clear cell renal cell carcinoma (RCC) with occupational TCE exposure	15177666	5	Y
A	162	c.485G>A	p.Cys162Tyr	1	clear cell renal cell carcinoma (RCC)	11921283	5	Y
A	162	c.485G>A	p.Cys162Tyr	1	clear cell renal cell carcinoma (RCC)	23797736	5	Y
A	162	c.485G>A	p.Cys162Tyr	1	Renal phenotype	15300849	5	Y
A	162	c.485G>A	p.Cys162Tyr	1	clear cell renal cell carcinoma (RCC)	19996202	5	Y
A	162	c.485G>A	p.Cys162Tyr	1	clear cell renal cell carcinoma (RCC)	7915601	5	Y
A	163	c.488T>A	p.Leu163His	1	clear cell renal cell carcinoma (RCC)	19996202	5	Y
A	163	c.488T>C	p.Leu163Pro	1	clear cell renal cell carcinoma (RCC)	24166983	5	Y
A	163	c.488T>C; 489C>T	p.Leu163Pro	1	renal cell carcinoma (RCC)	9059819	5	Y
A	163	c.488T>C	p.Leu163Pro	1	clear cell renal cell carcinoma (RCC)	11793370	5	Y
A	164	c.492G>T	p.Gln164His	1	Clear cell renal cell carcinoma (RCC)	10408776	5	Y
A	164	c.492G>T	p.Gln164His	1	renal cell carcinoma (RCC)	11505222	5	Y
A	164	c.491A>C	p.Gln164Pro	1	clear cell renal cell carcinoma (RCC)	19755989	5	Y
A	164	c.491A>C	p.Gln164Pro	1	clear cell renal cell carcinoma (RCC)	24727139	5	Y
A	164	c.491A>C	p.Gln164Pro	1	(ID Histology #39) clear cell renal cell carcinoma (RCC)	16488999	6	Y
A	164	c.491A>C	p.Gln164Pro	1	(ID Histology #62) clear cell renal cell carcinoma (RCC)	16488999	7	Y
A	165	c.494T>A	p.Val165Asp	1	clear cell renal cell carcinoma (RCC)	15932632	5	Y
A	165	c.494T>A	p.Val165Asp	1	clear cell renal cell carcinoma (RCC)	24727139	5	Y
A	165	c.493G>A	p.Val165Ile	1	clear cell renal cell carcinoma (RCC)	16488999	5	Y
A	166	c.497T>A	p.Val166Asp	1	clear cell renal cell carcinoma (RCC)	11921283	5	Y
A	166	T>A	p.Val166Asp	1	clear cell renal cell carcinoma (RCC)	23036577	5	Y
A	166	T>A	p.Val166Asp	1	clear cell renal cell carcinoma (RCC)	23036577	5	Y
A	166	c.497T>G	p.Val166Gly	1	clear cell renal cell carcinoma (RCC)	24166983	5	Y
A	166	c.497T>G	p.Val166Gly	1	clear cell renal cell carcinoma (RCC)	19996202	5	Y
A	166	c.496G>T	p.Val166Phe	1	Renal phenotype	15300849	5	Y
A	166	c.709G>T	p.Val166Phe	1	clear cell renal cell carcinoma (RCC)	10766184	5	Y
A	167	c.500G>A	p.Arg167Gln	1	renal cell carcinoma (RCC) after trichloroethylene exposure [Patient 1672]	10340905	5	Y
A	167	c.500G>A	p.Arg167Gln	1	renal cell carcinoma (RCC). Pedigree no. 5	7977367	5	Y
A	167	c.500G>A	p.Arg167Gln	1	clear cell renal cell carcinoma (RCC)	24166983	5	Y
A	167	c.500G>A	p.Arg167Gln	1	clear cell renal cell carcinoma (RCC)	23797736	5	Y
A	167	c.500G>A	p.Arg167Gln	1	Renal phenotype	15300849	5	Y
A	167	c.500G>A	p.Arg167Gln	1	renal cell carcinoma (RCC)	7881415	5	Y
A	167	c.500G>A	p.Arg167Gln	1	renal cell carcinoma (RCC) [Family 83, Brother]	28388566	5	Y
A	167	c.500G>A	p.Arg167Gln	1	renal cell carcinoma (RCC)	10766184	5	Y
A	167	c.500G>A	p.Arg167Gln	1	clear cell renal cell carcinoma (RCC) with occupational TCE exposure	15177666	5	Y
A	167	c.499C>G	p.Arg167Gly	1	RCC	20054297	5	Y
A	167	c.499C>T	p.Arg167Trp	1	clear cell renal cell carcinoma (ccRCC) [Family 6, father]	22357542	5	Y
A	167	c.499C>T	p.Arg167Trp	1	Renal phenotype	15300849	5	Y
A	167	c.499C>T	p.Arg167Trp	1	clear cell renal cell carcinoma (RCC) with occupational TCE exposure	15177666	5	Y
A	167	c.499C>T	p.Arg167Trp	1	clear cell renal cell carcinoma (RCC)	9143408	5	Y
A	167	c.499C>T	p.Arg167Trp	1	renal cell carcinoma (RCC). Pedigree no. 3	7977367	5	Y
A	167	c.499C>T	p.Arg167Trp	1	clear cell / granular cell renal cell carcinoma (RCC)	7915601	5	Y
A	169	c.506T>C	p.Leu169Pro	1	renal cell carcinoma (RCC)	11505222	5	Y
A	169	c.506T>C	p.Leu169Pro	1	clear cell renal cell carcinoma (RCC)	9143408	5	Y
A	169	c.506T>C	p.Leu169Pro	1	clear cell renal cell carcinoma (ccRCC)	21715564	5	Y
A	169	c.506T>C	p.Leu169Pro	1	clear cell renal cell carcinoma (RCC)	24727139	5	Y
A	169	c.506T>X	p.Leu169Pro	1	Clear cell renal cell carcinoma (ccRCC)	28853079	5	Y
A	169	T>C	p.Leu169Pro	1	clear cell renal cell carcinoma (RCC)	23036577	5	Y
A	169	c.506T>C	p.Leu169Pro	1	RCC	20054297	5	Y
A	170	c.509T>C	p.Val170Ala	1	Clear cell renal cell carcinoma (ccRCC)	28853079	5	Y
A	170	c.509T>A	p.Val170Asp	1	renal cell carcinoma (RCC) [Family E, I-1]	9681858	5	Y
A	170	c.509T>A	p.Val170Asp	1	renal cell carcinoma (RCC) [Family E, III-8]	9681858	5	Y
A	170	c.509T>A	p.Val170Asp	1	clear cell renal cell carcinoma (RCC)	16488999	5	Y
A	170	c.509T>G	p.Val170Gly	1	Renal phenotype	15300849	5	Y
A	171	c.513G>C	p.Lys171Asn	1	clear cell renal cell carcinoma (RCC)	23797736	5	Y
A	171	c.513G>C	p.Lys171Asp	1	renal cell carcinoma (RCC)	10326868	5	Y
A	174	c.520A>G	p.Asn174Asp	1	clear cell renal cell carcinoma (RCC)	11793370	5	Y
A	175	c.523T>G	p.Tyr175Asp	1	clear cell renal cell carcinoma (RCC)	11921283	5	Y
A	176	c.526A>T	p.Arg176Trp	1	Clear cell renal cell carcinoma (RCC)	10408776	5	Y
A	176	c.526A>T	p.Arg176Trp	1	renal cell carcinoma (RCC)	11505222	5	Y
A	178	c.533T>G	p.Leu178Arg	1	clear cell renal cell carcinoma (ccRCC) [Family 7, son]	22357542	5	Y
A	178	c.533T>G	p.Leu178Arg	1	renal cell carcinoma (RCC)	11051223	5	Y
A	178	c.533T>G	p.Leu178Arg	1	renal cell carcinoma (RCC) [Family 86, Son of Brother2]	28388566	5	Y
A	178	c.533T>C	p.Leu178Pro	1	clear cell renal cell carcinoma (RCC)	23797736	5	Y
A	180	c.539T>A	p.Ile180Asn	1	renal cell carcinoma (RCC). Cell line A-704/ cell line 769-P	7977367	5	Y
A	180	c.539T>A	p.Ile180Asn	1	clear cell renal cell carcinoma (RCC)	10454237	5	Y
A	180	c.539T>A	p.Ile180Asn	1	renal cell carcinoma (RCC)	11536052	5	Y
A	180	c.538A>G	p.Ile180Val	1	renal cell carcinoma (RCC)	17024664	5	Y
A	180	c.538A>G	p.Ile180Val	1	Von Hippel-Lindau syndrome Type 1: clear cell renal cell carcinoma (ccRCC)	21715564	5	Y
A	183	c.548C>T	p.Ser183Leu	1	clear cell renal cell carcinoma (RCC)	11921283	5	Y
A	184	T>G	p.Leu184Arg	1	clear cell renal cell carcinoma (RCC)	23036577	5	Y
A	184	c.551T>A	p.Leu184His	1	Renal phenotype	15300849	5	Y
A	184	c.551T>C	p.Leu184Pro	1	renal cell carcinoma (RCC)	11505222	5	Y
A	184	c.551T>C	p.Leu184Pro	1	Clear cell renal cell carcinoma (RCC)	7591282	5	Y
A	184	c.551T>C	p.Leu184Pro	1	Von Hippel-Lindau syndrome Type 1: clear cell renal cell carcinoma (ccRCC)	21715564	5	Y
A	184	c.552C>T	p.Leu184Pro	1	clear cell renal cell carcinoma (ccRCC)	21715564	5	Y
A	184	c.551T>C	p.Leu184Pro	1	RCC	20054297	5	Y
A	184	c.551T>C	p.Leu184Pro	1	clear cell renal cell carcinoma (RCC)	19996202	5	Y
A	188	c.563T>G	p.Leu188Arg	1	RCC	20054297	5	Y
A	188	c.563T>A	p.Leu188Gln	1	clear cell renal cell carcinoma (RCC)	15932632	5	Y
A	188	c.563T>A	p.Leu188Gln	1	clear cell renal cell carcinoma (RCC)	11921283	5	Y
A	188	c.563T>C	p.Leu188Pro	1	Renal phenotype	15300849	5	Y
A	188	c.563T>C	p.Leu188Pro	1	RCC	20054297	5	Y
A	188	c.563T>C	p.Leu188Pro	1	RCC	20054297	5	Y
A	188	c.562C>G	p.Leu188Val	1	clear cell renal cell carcinoma (RCC) with occupational TCE exposure	15177666	5	Y
A	189	c.565G>A	p.Glu189Lys	1	clear cell renal cell carcinoma (RCC)	11921283	5	Y
A	189	c.565G>A	p.Glu189Lys	2	renal cell carcinoma (RCC)	11536052	5	Y
E	192	c.575C>T	p.Pro192Leu	1	clear cell renal cell carcinoma (RCC)	11793370	5	Y
E	192	c.574C>T	p.Pro192Ser	1	clear cell renal cell carcinoma (RCC)	24166983	5	Y
E	192	c.574C>T	p.Pro192Ser	1	renal cell carcinoma (RCC)	11536052	5	Y
E	195	c.584A>G	p.Gln195Arg	1	renal cell carcinoma (RCC)	11536052	5	Y
E	195	c.584A>G	p.Gln195Arg	1	renal cell carcinoma (RCC)	11536052	5	Y
E	198	c.593T>G	p.Leu198Arg	1	renal cell carcinoma (RCC). Pedigree no. 7	7977367	5	Y
E	200	c.598C>T	p.Arg200Trp	1	clear cell renal cell carcinoma (RCC) with occupational TCE exposure	15177666	5	Y
E	204	c.610G>A	p.Glu204Lys	1	renal cell carcinoma (RCC)	11536052	5	Y
E	207	c.620C>T	p.Ala207Val	1	clear cell renal cell carcinoma (RCC)	11793370	5	Y
E	208	c.622C>A	p.His208Asn	1	Rhabdoid / epithelioid / clear cell renal cell carcinoma (RCC)	26111976	5	Y
E	211	c.633G>A	p.Met211Ile	1	clear cell renal cell carcinoma (RCC)	11793370	5	Y
E	119,200	c.357C>G, c.598C>T	p.Phe119Leu, p.Arg200Trp	1	renal cell carcinoma (RCC) after trichloroethylene exposure [Patient 1685]	10340905	5	Y
D	37,45,50	c.109G>A & c.135G>A & c.148G>A	p.Glu37Lys & p.Pro45Pro & p.Ala50Thr	1	renal cell carcinoma (RCC)	10454237	5	Y
B, D	74,50	c.221T>C & 149C>G	p.Val74Ala & p.Ala50Gly	1	clear cell renal cell carcinoma (RCC)	15932632	5	Y
B, C, A	81,119,162,188	c.241C>T, 357C>G, c.486C>G, c.562C>G	p.Pro81Ser, p.Phe119Leu, p.Cys162Trp, p.Leu188Val	1	renal cell carcinoma (RCC) after trichloroethylene exposure [Patient 1695]	10340905	5	Y
E		c.642A>C	p.X214Cys	1	clear cell renal cell carcinoma (ccRCC)	21715564	5	Y

## Sheet: pheochromocytoma
surface	codon	Variant	Effect	#	Disease	PubMed ID	SCORE	verified
D	25	c.74C>T	p.Pro25Leu	1	bilateral benign adrenal Pheochromocytoma	9663592	5	Y
D	38	c.112T>C	p.Ser38Pro	1	Pheochromocytoma	9452032	5	Y
D	57	c.170G>A	p.Gly57Glu	1	Pheochromocytoma adrenal unilateral	12673678	5	Y
D	59	c.175C>T	p.Pro59Ser	1	Patient 364, age 62. pheochromocytoma	21463266	5	Y
B	63	c.188T>C	p.Leu63Pro	1	Unilateral, Benign, Adrenal Pheochromocytoma	9663592	5	Y
B	64	c.191G>C	p.Arg64Pro	1	Same family: 31: Bilateral, Benign, Adrenal Pheochromocytoma	9663592	5	Y
B	64	c.191G>C	p.Arg64Pro	1	Patient 123, age 26. pheochromocytoma	21463266	5	Y
B	64	c.191G>C	p.Arg64Pro	1	Same family: 34: Bilateral, Malignant adrenal Pheochromocytoma	9663592	5	Y
B	65	c.193T>G	p.Ser65Ala	1	Pheochromocytoma	12000816	5	Y
B	65	c.193T > G	p.Ser65Ala	1	Pheochromocytoma	21784903	5	Y
B	65	c.193T>G	p.Ser65Ala	1	Female 26 yo. Pheochromocytoma	[”21784903	5	Y
B	65	c.193T>G	p.Ser65Ala	1	Pheochromocytoma, female 49 yo	24466223	5	Y
B	65	c.193T>A	p.Ser65Thr	1	Pheochromocytoma, male 58 yo	24466223	5	Y
B	68	c.203C>G	p.Ser68Trp	1	Pheochromocytoma	12000816	5	Y
B	74	c.221T>G	p.Val74Gly	1	Von Hippel-Lindau syndrome Type 2: pheochromocytoma	8956040	5	Y
B	76	c.224_226delTCT	p.Phe76del	1	Family 16, female. Unilateral pheochromocytoma	29124493	5	Y
B	80	c.239G>A	p.Ser80Asn	1	Pheochromocytoma	12000816	5	Y
B	80	c.238A>G	p.Ser80Gly	2	Bilateral Pheochromocytomas in mother and daughter	9215674	5	Y
B	80	c.238A>G	p.Ser80Gly	1	Pheochromocytoma, female 25 yo	24466223	5	Y
B, A	81.188	c.241C>T	p.Pro81Ser & p.Leu188Val (562C>G)	9	Von Hippel-Lindau syndrome Type 2C: pheochromocytoma -only phenotype	12414898	5	Y
B	82	c.244C>G	p.Arg82Gly	1	Female 26 yo. Pheochromocytoma	21784903	5	Y
B	82	c.244C > G	p.Arg82Gly	1	Pheochromocytoma	21784903	5	Y
B	82	c.244C > G	p.Arg82Gly	1	Pheochromocytoma	21784903	5	Y
B	82	c.244C>G	p.Arg82Gly	1	3 year-old girl with an inherited right adrenal malignant pheochromocytoma	28781534	5	Y
B	82	c.244C>G	p.Arg82Gly	1	Male 49 yo. Pheochromocytoma	21784903	5	Y
B	82	c.245G>T	p.Arg82Leu	1	Pheochromocytoma	20151405	5	Y
B	82	c.245G>T	p.Arg82Leu	1	familial bilateral pheochromocytoma	23626751	5	Y
B	82	c.245G>T	p.Arg82Leu	1	Male 17 yo. Pheochromocytoma	21784903	5	Y
B	82	c.245G > T	p.Arg82Leu	1	Pheochromocytoma	21784903	5	Y
B	84	c.250G>T	p.Val84Leu	1	Bilateral Pheochromocytoma. [Family A, brother and sister. Both patients and a non-penetrant parent were heterozygous for this missense mutation.]	8592333	5	Y
B	84		p.Val84Leu	1	Pheochromocytoma	25545346	5	Y
B	84	c.250G>C	p.Val84Leu	1	Patient 141, age 24. pheochromocytoma	21463266	5	Y
B	93	c.278G>A	p.Gly93Asp	1	Von Hippel-Lindau syndrome Type 2: pheochromocytoma	8956040	5	Y
B	93	c.277G>T	p.Gly93Cys	1	Pheochromocytoma	12000816	5	Y
B	93	c.278G>T	p.Gly93Cys	1	Pheochromocytoma	12000816	5	Y
B	93	c.277G>A	p.Gly93Ser	1	Pheochromocytoma. Case 1	12000816	5	Y
B	93	c.277G>A	p.Gly93Ser	1	Von Hippel-Lindau syndrome Type 2C: pheochromocytoma -only phenotype	17661816	5	Y
B	93	c.277G>A	p.Gly93Ser	1	Von Hippel-Lindau syndrome Type 2: pheochromocytoma	8956040	5	Y
B	93	c.277G>A	p.Gly93Ser	1	Von Hippel-Lindau syndrome Type 2C: pheochromocytoma -only phenotype	8707293	5	Y
B	93	c.277G>A	p.Gly93Ser	1	Pheochromocytoma	8768845	5	Y
B	93	c.277G>A	p.Gly93Ser	1	Pheochromocytoma. Case 2	12000816	5	Y
B	93	c.278G>T	p.Gly93Val	1	Pheochromocytoma	12000816	5	Y
B	98	c.293A>G	p.Tyr98Cys	1	Male 46 yo. Pheochromocytoma	21784903	5	Y
B	98	c.293A > G	p.Tyr98Cys	1	Pheochromocytoma	21784903	5	Y
B	98	c.292T>C	p.Tyr98His	1	Pheochromocytoma	12000816	5	Y
B	98	c.292T>C	p.Tyr98His	1	Von Hippel-Lindau syndrome Type 2: pheochromocytoma	8956040	5	Y
B	101	c.302T>A	p.Leu101Gln	1	Pheochromocytoma	21784903	5	Y
B	103	c.307C>G	p.Pro103Ala	1	Patient 55, age 16. pheochromocytoma	21463266	5	Y
C	107	c.319C>G	p.Arg107Gly	1	Pheochromocytoma	12000816	5	Y
C	109	c.326T>G	p.Ile109Ser	1	Pheochromocytoma	25545346	5	Y
C	111	c.330CA>TT	p.Ser111Cys	1	Von Hippel-Lindau syndrome Type 2: pheochromocytoma. Lineage 174	9829911	5	Y
C	111	c.331A>T	p.Ser111Cys	1	Patient 2. Unilateral Pheochromocytoma	12807974	5	Y
C	111	c.331A>T	p.Ser111Cys	1	Patient 3. Unilateral Pheochromocytoma	12807974	5	Y
C	112	c.334T>C	p.Tyr112His	1	Von Hippel-Lindau syndrome Type 2: pheochromocytoma	8956040	5	Y
C	112	c.334T>C	p.Tyr112His	1	Von Hippel-Lindau syndrome Type 2A: pheochromocytoma (case 1)	8863170	5	Y
C	112	c.334T>C	p.Tyr112His	1	Von Hippel-Lindau syndrome Type 2A: pheochromocytoma (case 2)	8863170	5	Y
C	112	c.334T>C	p.Tyr112His	1	Von Hippel-Lindau syndrome Type 2A: pheochromocytoma (case 3)	8863170	5	Y
C	114	c.340G>C	p.Gly114Arg	1	Von Hippel-Lindau syndrome Type 2: pheochromocytoma	8956040	5	Y
C	114	c.340G>C	p.Gly114Arg	1	Von Hippel-Lindau syndrome Type 2: pheochromocytoma. Lineage 12	9829911	5	Y
C	114	c.340G>T	p.Gly114Cys	1	Von Hippel-Lindau syndrome Type 2: pheochromocytoma. Kindred 40	7987306	5	Y
C	114	c.340G>A	p.Gly114Ser	1	Bilateral Pheochromocytoma	8825918	5	Y
C	115	c.345C>A	p.His115Gln	1	Von Hippel-Lindau syndrome Type 2: pheochromocytoma	8956040	5	Y
C	117	G>C	p.Trp117Ser	1	Pheochromocytoma	25545346	5	Y
C	118	c.353T>G	p.Leu118Arg	1	Von Hippel-Lindau syndrome Type 2: pheochromocytoma	8730290	5	Y
C	119	c.357C>G	p.Phe119Leu	1	Pheochromocytoma	12000816	5	Y
C	119	c.357C>G	p.Phe119Leu	1	Von Hippel-Lindau syndrome Type 2: pheochromocytoma	8956040	5	Y
C	119	c.355T>C	p.Phe119Leu	1	Von Hippel-Lindau syndrome Type 2: pheochromocytoma	16142346	5	Y
C	119	c.356T>C	p.Phe119Ser	1	Bilateral Pheochromocytoma	8825918	5	Y
C	120	c.358A>G	p.Arg120Gly	1	CNS Hemangioblastoma (HB), Pheochromocytoma	20151405	5	Y
C	120	c.360A>C	p.Arg120Ser	1	Female 49 yo. Pheochromocytoma	21784903	5	Y
C	120	c.360A > C	p.Arg120Ser	1	Pheochromocytoma	21784903	5	Y
C	120		p.Arg120Thr	1	VHL type IIC: unilateral pheochromocytoma (non-syndromic). Proband 6	25773797	5	Y
C	120		p.Arg120Thr	1	VHL type IIC: unilateral pheochromocytoma (non-syndromic). Proband 7	25773797	5	Y
C	120		p.Arg120Thr	1	VHL type IIC: unilateral pheochromocytoma (non-syndromic). Carrier 8 (mother to proband 6)	25773797	5	Y
C	121	c.361G>A	p.Asp121Asn	1	Pheochromocytoma	16142346	5	Y
C	122	c.264-365GC>AT	p.Ala122Ile	1	Pheochromocytoma	12000816	5	Y
C	125	c.374A>C	p.His125Pro	1	Pheochromocytoma	21461997	5	Y
C	125		p.His125Pro	1	VHL type IIC: bilateral pheochromocytoma (non-syndromic). Carrier 1 (sister to proband 1)	25773797	5	Y
C	125		p.His125Pro	1	VHL type IIC: bilateral pheochromocytoma (non-syndromic). Proband 2	25773797	5	Y
C	125		p.His125Pro	1	VHL type IIC: bilateral pheochromocytoma (non-syndromic). Proband 3	25773797	5	Y
C	125		p.His125Pro	1	VHL type IIC: bilateral pheochromocytoma (non-syndromic). Proband 4	25773797	5	Y
C	125		p.His125Pro	1	VHL type IIC: bilateral pheochromocytoma (non-syndromic). Proband 5	25773797	5	Y
C	125		p.His125Pro	1	VHL type IIC: unilateral pheochromocytoma (non-syndromic). Proband 1	25773797	5	Y
C	128	c.381-382GC>TT	p.Leu128Phe	1	Von Hippel-Lindau syndrome Type 2: pheochromocytoma. Lineage 29	9829911	5	Y
C	128	c.382C>T	p.Leu128Phe	1	Von Hippel-Lindau syndrome Type 2: pheochromocytoma	8956040	5	Y
C	129	c.386T>C	p.Leu129Pro	1	Pheochromocytoma	24694336	5	Y
C	130	c.389T>G	p.Val130Gly	1	Pheochromocytoma	21461997	5	Y
C	131	c.393C>A	p.Asn131Lys	1	Von Hippel-Lindau syndrome Type 2A: pheochromocytoma	9829912	5	Y
C	136	c.407T>G	p.Phe136Cys	1	Pheochromocytoma	12000816	5	Y
C	136	c.407T>G	p.Phe136Cys	1	Von Hippel-Lindau syndrome Type 2: pheochromocytoma	8956040	5	Y
C	143	c.429C>G	p.Asp143Glu	1	Unilateral Pheochromocytoma	8825918	5	Y
C	144	c.431G>A	p.Gly144Gln	1	Unilateral, benign, Adrenal Pheochromocytoma	9663592	5	Y
C	147	c.440T>C	p.Ile147Thr	1	Unilateral, benign, Adrenal Pheochromocytoma	9663592	5	Y
C	149	c.445G>T	p.Ala149Ser	1	Patient III-20, age 32. Von Hippel-Lindau syndrome Type 2B: bilateral adrenal pheochromocytoma;	23673869	5	Y
C	149	c.445G>T	p.Ala149Ser	1	Patient II-6, age 45. Von Hippel-Lindau syndrome Type 2B: right adrenal pheochromocytoma;	23673869	5	Y
C	149	c.445G>T	p.Ala149Ser	1	Patient III-16, age 24. Von Hippel-Lindau syndrome Type 2B: bilateral adrenal pheochromocytoma;	23673869	5	Y
C	149	c.445G>T	p.Ala149Ser	1	Patient III-14, age 31. Von Hippel-Lindau syndrome Type 2B: bilateral adrenal pheochromocytoma;	23673869	5	Y
C	149	c.445G>T	p.Ala149Ser	1	Patient III-11, age 30. Von Hippel-Lindau syndrome Type 2B: bilateral adrenal pheochromocytoma;	23673869	5	Y
C	149	c.445G>T	p.Ala149Ser	1	Patient IV- age 15. Von Hippel-Lindau syndrome Type 2B; bilateral adrenal pheochromocytoma;	23673869	5	Y
C	149	c.445G>A	p.Ala149Thr	1	Von Hippel-Lindau syndrome Type 2: pheochromocytoma	8956040	5	Y
C	153	c.458T>A	p.Leu153Gln	1	Pheochromocytoma, female 47 yo	24466223	5	Y
A	154	c.461C>T	p.Pro154Leu	1	Von Hippel-Lindau syndrome Type 2: pheochromocytoma. Kindred 49	7987306	5	Y
A	154	c.461C>T	p.Pro154Leu	1	Von Hippel-Lindau syndrome Type 2: pheochromocytoma	8956040	5	Y
A	156	c.466T>A	p.Tyr156Asn	1	Pheochromocytoma	12000816	5	Y
A	156	c.467A>G	p.Tyr156Cys	1	Pheochromocytoma	20151405	5	Y
A	156	c.467A>G	p.Tyr156Cys	1	Pheochromocytoma. Case 1	12000816	5	Y
A	156	c.467A>G	p.Tyr156Cys	1	Patient 18. Bilateral Pheochromocytoma	12807974	5	Y
A	156	c.467A>G	p.Tyr156Cys	1	Pheochromocytoma. Case 2	12000816	5	Y
A	157	c.470C>T	p.Thr157Ile	1	Von Hippel-Lindau syndrome Type 2A: pheochromocytoma	9829912	5	Y
A	157	C>T	p.Thr157Ile	1	Pheochromocytoma	25545346	5	Y
A	157	c.470C>T	p.Thr157Ile	1	Patient 8, age 23. CNS HB, retinal HB, pheochromocytoma	21463266	5	Y
A	157	c.470C>T	p.Thr157Ile	1	Von Hippel-Lindau syndrome Type 2: pheochromocytoma	8956040	5	Y
A	157	c.470C>T	p.Thr157Ile	1	Patient 19, age 26. retinal HB, pheochromocytoma	21463266	5	Y
A	158	c.473T>C	p.Leu158Pro	1	Von Hippel-Lindau syndrome Type 2: pheochromocytoma	8956040	5	Y
A	159	c.475A>G	p.Lys159Glu	1	Female 55 yo. Pheochromocytoma	21784903	5	Y
A	159	c.475A>G	p.Lys159Glu	1	Von Hippel-Lindau syndrome Type 2: pheochromocytoma	8956040	5	Y
A	159	c.475A>G	p.Lys159Glu	1	Pheochromocytoma, male 47 yo	24466223	5	Y
A	159	c.475A > G	p.Lys159Glu	1	Pheochromocytoma	21784903	5	Y
A	161	c.481C>G	p. Arg161Gly	1	Von Hippel-Lindau syndrome Type 2: pheochromocytoma	8956040	5	Y
A	161	c.482G>A	p.Arg161Gln	1	Bilateral Pheochromocytoma (Family history of pheo)	14722919	5	Y
A	161	c.482G>A	p.Arg161Gln	1	Von Hippel-Lindau syndrome Type 2: pheochromocytoma. Lineage 3	9829911	5	Y
A	161	c.482G>A	p.Arg161Gln	1	Patient 16, female 20 yo. Bilateral pheochromocytoma [Family history +]	27539324	5	Y
A	161	c.482G>A	p.Arg161Gln	1	Patient 17, female 6 yo. Unilateral pheochromocytoma [Family history +]	27539324	5	Y
A	161	c.482G>A	p.Arg161Gln	1	Patient 18, male 34 yo. Bilateral pheochromocytoma	27539324	5	Y
A	161	c.482G>A	p.Arg161Gln	1	right pheochromocytoma [Patient F2-II-11]	23842656	5	Y
A	161	c.482G>A	p.Arg161Gln	1	bilateral pheochromocytoma (heterochronous) [Patient F2-III-9]	23842656	5	Y
A	161	c.482G>A	p.Arg161Gln	1	bilateral pheochromocytoma (simultaneous) [Patient F2-III-4]	23842656	5	Y
A	161	c.482G>A	p.Arg161Gln	1	Family 1, female. Bilateral pheochromocytoma. Cause of death: ruptured aortic aneurysm of Takayasu arteritis.	29124493	5	Y
A	161	c.482G>A	p.Arg161Gln	1	Family 1, male. Bilateral pheochromocytoma.	29124493	5	Y
A	161	c.482G>A	p.Arg161Gln	1	Family 2, female. Bilateral pheochromocytoma.	29124493	5	Y
A	161	c.482G>A	p.Arg161Gln	1	Family 14, male. Bilateral pheochromocytoma	29124493	5	Y
A	161	c.482G>A	p.Arg161Gln	1	Patient 244, age 8. pheochromocytoma	21463266	5	Y
A	161	c.482G>A	p.Arg161Gln	1	Von Hippel-Lindau syndrome Type 2: pheochromocytoma	8956040	5	Y
A	161	c.482G>A	p.Arg161Gln	1	Pheochromocytoma, female 66 yo	24466223	5	Y
A	161	c.482G>A	p.Arg161Gln	1	Von Hippel-Lindau syndrome Type 2: pheochromocytoma. Lineage 3	9829911	5	Y
A	161	c.482G>A	p.Arg161Gln	1	Pheochromocytoma. Case 1	12000816	5	Y
A	161	c.482G>A	p.Arg161Gln	1	Von Hippel-Lindau syndrome Type 2A: pheochromocytoma. Patient V32	9829912	5	Y
A	161	c.482G>A	p.Arg161Gln	4	Von Hippel-Lindau syndrome Type 2: pheochromocytoma	17024664	5	Y
A	161	c.482G>A	p.Arg161Gln	1	Pheochromocytoma. Case 2	12000816	5	Y
A	161	c.482G>A	p.Arg161Gln	1	Von Hippel-Lindau syndrome Type 2A: pheochromocytoma. Patient V60	9829912	5	Y
A	161	c.482G>A	p.Arg161Gln	1	Von Hippel-Lindau syndrome Type 2A: pheochromocytoma. Patient V97	9829912	5	Y
A	161	c.482G>C	p.Arg161Pro	1	Pheochromocytoma	12000816	5	Y
A	162	c.485G>A	p.Cys162Tyr	1	Patient 4. Von Hippel-Lindau syndrome Type 2: Unilateral Pheochromocytoma	12807974	5	Y
A	163	c.487C>T	p.Leu163Phe	1	Patient 30, male 42 yo. Unilateral pheochromocytoma	27539324	5	Y
A	163	c.487C>T	p.Leu163Phe	1	Family 10, male. Unilateral pheochromocytoma, neural HB	29124493	5	Y
A	164	c.491A>G	p.Gln164Arg	1	Pheochromocytoma, Retinal Hemangioblastoma (HB)	17024664	5	Y
A	164	c.491A>G	p.Gln164Arg	1	Unilateral Pheochromocytoma (UniProt)	8825918	5	Y
A	164	c.492G>T	p.Gln164His	1	Pheochromocytoma adrenal unilateral	12673678	5	Y
A	164	G>C	p.Gln164His	1	Pheochromocytoma	25545346	5	Y
A	164	c.491G>C	p.Gln164His	1	Patient 10: Unilateral Pheochromocytoma	12807974	5	Y
A	166	c.497T>C	p.Val166Ala	1	Von Hippel-Lindau syndrome Type 2C: Bilateral Pheochromocytoma	17661816	5	Y
A	166	c.496G>T	p.Val166Phe	1	Bilateral Pheochromocytoma	20151405	5	Y
A	166	c.496G>T	p.Val166Phe	1	Von Hippel-Lindau syndrome Type 2: pheochromocytoma	8730290	5	Y
A	166	c.496G>T	p.Val166Phe	1	Von Hippel-Lindau syndrome Type 2A: pheochromocytoma	9829912	5	Y
A	166	c.5496G>T	p.Val166Phe	1	Female 26 yo. Pheochromocytoma	21784903	5	Y
A	166	c.496G>T	p.Val166Phe	1	Von Hippel-Lindau syndrome Type 2: pheochromocytoma	8956040	5	Y
A	167	c.500G>A	p.Arg167Gln	1	Von Hippel-Lindau syndrome Type 2: pheochromocytoma	8956040	5	Y
A	167	c.500G>A	p.Arg167Gln	1	Pheochromocytoma	12000816	5	Y
A	167	c.500G>A	p.Arg167Gln	1	Von Hippel-Lindau syndrome Type 2: pheochromocytoma. Lineage 100	9829911	5	Y
A	167	c.500G>A	p.Arg167Gln	1	Patient 13, female 13 yo. Bilateral pheochromocytoma	27539324	5	Y
A	167	c.500G>A	p.Arg167Gln	1	Von Hippel-Lindau syndrome Type 2: pheochromocytoma. Kindred 33	7987306	5	Y
A	167	c.500G>A	p.Arg167Gln	1	pheochromocytoma [Family 80, Sister]	28388566	5	Y
A	167	c.500G>A	p.Arg167Gln	1	pheochromocytoma [Family 83, Proband]	28388566	5	Y
A	167	c.500G>A	p.Arg167Gln	1	Family 9, female. Bilateral pheochromocytoma	29124493	5	Y
A	167	c.500G>A	p.Arg167Gln	1	Von Hippel-Lindau syndrome Type 2: pheochromocytoma. Kindred 65	7987306	5	Y
A	167	c.500G>A	p.Arg167Gln	1	Von Hippel-Lindau syndrome Type 2: pheochromocytoma. Kindred 72	7987306	5	Y
A	167	c.500G>A	p.Arg167Gln	1	Von Hippel-Lindau syndrome Type 2: pheochromocytoma. Kindred 121	7987306	5	Y
A	167	c.500G>A	p.Arg167Gln	1	Von Hippel-Lindau syndrome Type 2: pheochromocytoma. Lineage 42	9829911	5	Y
A	167	c.500G>A	p.Arg167Gln	1	Von Hippel-Lindau syndrome Type 2: pheochromocytoma. Lineage 44	9829911	5	Y
A	167	c.500G>A	p.Arg167Gln	1	Von Hippel-Lindau syndrome Type 2: pheochromocytoma. Lineage 88	9829911	5	Y
A	167	c.500G>A	p.Arg167Gln	1	Von Hippel-Lindau syndrome Type 2: pheochromocytoma. Lineage 105	9829911	5	Y
A	167	c.500G>A	p.Arg167Gln	1	Von Hippel-Lindau syndrome Type 2: pheochromocytoma. Lineage 135	9829911	5	Y
A	167	c.499C>G	p.Arg167Trp	1	Patient 6: unilateral pheochromocytoma	12807974	5	Y
A	167	c.499C>G	p.Arg167Trp	1	Patient 5: Bilateral Pheochromocytoma	12807974	5	Y
A	167	c.499C>T	p.Arg167Trp	1	Von Hippel-Lindau syndrome Type 2: pheochromocytoma. Lineage 202	9829911	5	Y
A	167	c.499C>T	p.Arg167Trp	1	Pheochromocytoma adrenal unilateral	12673678	5	Y
A	167	c.499C>T	p.Arg167Trp	1	Pheochromocytoma (lymph node metastasis)	12673678	5	Y
A	167	c.499C>T	p.Arg167Trp	1	Von Hippel-Lindau syndrome Type 2: pheochromocytoma. Kindred 63	7987306	5	Y
A	167	c.499C>T	p.Arg167Trp	1	pheochromocytoma [Family 74, Mother]	28388566	5	Y
A	167	c.499C>T	p.Arg167Trp	1	pheochromocytoma [Family 75, Proband]	28388566	5	Y
A	167	c.499C>T	p.Arg167Trp	1	pheochromocytoma [Family 76, Proband]	28388566	5	Y
A	167	c.499C>T	p.Arg167Trp	1	renal cell carcinoma (RCC), pheochromocytoma [Family 76, Son of Uncle]	28388566	5	Y
A	167	C>T	p.Arg167Trp	2	Pheochromocytoma	25545346	5	Y
A	167	c.499C>T	p.Arg167Trp	1	Family 17, male. Bilateral pheochromocytoma, PNET	29124493	5	Y
A	167	c.499C>T	p.Arg167Trp	1	Family 18, male. Bilateral pheochromocytoma, retinal HB	29124493	5	Y
A	167	c.499C>T	p.Arg167Trp	1	Von Hippel-Lindau syndrome Type 2: pheochromocytoma. Kindred 95	7987306	5	Y
A	167	c.499C>T	p.Arg167Trp	1	Von Hippel-Lindau syndrome Type 2: pheochromocytoma. Kindred 116	7987306	5	Y
A	167	c.499C>G	p.Arg167Trp	1	Patient 1: Bilateral Pheochromocytoma	12807974	5	Y
A	167	c.499C>G	p.Arg167Trp	1	Patient 7: Bilateral Pheochromocytoma	12807974	5	Y
A	167	c.499C>G	p.Arg167Trp	1	Patient 13: Bilateral Pheochromocytoma	12807974	5	Y
A	167	c.499C>G	p.Arg167Trp	1	Patient 14: Bilateral Pheochromocytoma	12807974	5	Y
A	167	c.499C>T	p.Arg167Trp	1	Patient 164, age 12. pheochromocytoma	21463266	5	Y
A	167	c.499C>T	p.Arg167Trp	1	Patient 260, age 25. pheochromocytoma, RCC	21463266	5	Y
A	167	c.499C>T	p.Arg167Trp	1	Pheochromocytoma, female 25 yo	24466223	5	Y
A	167	c.499C>T	p.Arg167Trp	1	Pheochromocytoma, male 21 yo	24466223	5	Y
A	167	c.499T>C	p.Arg167Trp	1	Pheochromocytoma, female 25 yo	24466223	5	Y
A	167	c.499C>T	p.Arg167Trp	1	Von Hippel-Lindau syndrome Type 2: pheochromocytoma. Lineage 47	9829911	5	Y
A	167	c.499C>T	p.Arg167Trp	1	Von Hippel-Lindau syndrome Type 2A: pheochromocytoma. Patient V30a	9829912	5	Y
A	167	c.499C>T	p.Arg167Trp	1	Pheochromocytoma. Case 1	[”12000816]	5	Y
A	167	c.499C>T	p.Arg167Trp	1	Von Hippel-Lindau syndrome Type 2: pheochromocytoma	8956040	5	Y
A	167	c.499C>T	p.Arg167Trp	1	Von Hippel-Lindau syndrome Type 2: pheochromocytoma. Lineage 102	9829911	5	Y
A	167	c.499C>T	p.Arg167Trp	1	Bilateral Pheochromocytoma [Family 386, mother]	8592333	5	Y
A	167	c.499C>T	p.Arg167Trp	1	Von Hippel-Lindau syndrome Type 2: pheochromocytoma. Lineage 106	9829911	5	Y
A	167	c.499C>T	p.Arg167Trp	1	Unilateral pheochromocytoma [Family 386, son (15 y.o.)]	8592333	5	Y
A	167	c.499C>T	p.Arg167Trp	1	Bilateral Pheochromocytoma [Family 386, son (11 y.o.)]	8592333	5	Y
A	167	c.499C>T	p.Arg167Trp	1	Pheochromocytoma. Case 2	12000816	5	Y
A	167	c.499C>T	p.Arg167Trp	1	Pheochromocytoma. Case 3	12000816	5	Y
A	167	c.499C>T	p.Arg167Trp	1	Pheochromocytoma. Case 4	12000816	5	Y
A	167	c.499C>T	p.Arg167Trp	1	Pheochromocytoma. Case 5	12000816	5	Y
A	167	c.499C>T	p.Arg167Trp	1	Pheochromocytoma. Case 6	12000816	5	Y
A	167	c.499C>T	p.Arg167Trp	1	Von Hippel-Lindau syndrome Type 2: pheochromocytoma. Lineage 109	9829911	5	Y
A	167	c.499C>T	p.Arg167Trp	1	Von Hippel-Lindau syndrome Type 2: pheochromocytoma. Lineage 153	9829911	5	Y
A	167	c.499C>T	p.Arg167Trp	1	Von Hippel-Lindau syndrome Type 2: II1: bilateral pheochromocytoma	9156047	5	Y
A	170	c.509T>C	p.Val170Ala	1	Patient 25, male 28 yo. Unilateral pheochromocytoma	27539324	5	Y
A	170	c.509T>C	p.Val170Ala	1	Family 13, male. Unilateral pheochromocytoma	29124493	5	Y
A	170	c.509T>A	p.Val170Asp	1	CNS Hemangioblastoma (HB), pheochromocytoma [Family E, II-7]	9681858	5	Y
A	170	c.509T>A	p.Val170Asp	1	retinal Hemangioblastoma (HB), pheochromocytoma [Family E, III-7]	9681858	5	Y
A	170	c.509T>A	p.Val170Asp	1	Von Hippel-Lindau syndrome Type 2: pheochromocytoma	8956040	5	Y
A	170	c.509T>G	p.Val170Gly	1	Patient 53, age 37. retinal HB, pheochromocytoma	21463266	5	Y
A	170	c.508G>T	p.Val170Phe	1	Von Hippel-Lindau syndrome Type 2: pheochromocytoma. Kindred 26	7987306	5	Y
A	175	c.523A>G	p.Tyr175Cys	1	Unilateral Pheochromocytoma (Family history of pheochromocytomas)	14722919	5	Y
A	178	c.533T>A	p.Leu178Gln	1	Patient 31, male 21 yo. Unilateral pheochromocytoma	27539324	5	Y
A	178	c.533T>A	p.Leu178Gln	1	Patient 32, male 14 yo. Bilateral pheochromocytoma [Family history +]	27539324	5	Y
A	178	c.533T>A	p.Leu178Gln	1	Von Hippel-Lindau syndrome Type 2: pheochromocytoma	8956040	5	Y
A	178	c.533T>C	p.Leu178Pro	1	Von Hippel-Lindau syndrome Type 2: pheochromocytoma	8956040	5	Y
A	183	c.548C>G	p.Ser183Trp	1	Patient 21, female 35 yo. Unilateral pheochromocytoma	27539324	5	Y
A	184	c.551T>A	p.Leu184His	1	Pheochromocytoma, female 31 yo	24466223	5	Y
A	188	c.563T>C	p.Leu188Pro	1	Von Hippel-Lindau syndrome Type 2: pheochromocytoma. Lineage 73	9829911	5	Y
A	188	c.562C>G	p.Leu188Val	1	Pheochromocytoma	12000816	5	Y
A	188	c.562C>G	p.Leu188Val	7	family with pheochromocytoma	8772572	5	Y
A	188	c.562C>G	p.Leu188Val	1	Von Hippel-Lindau syndrome Type 2: pheochromocytoma	8956040	5	Y
E	194	T>G	p.Val194Gly	1	17-year-old female, left adrenal malignant pheochromocytoma, metastatic lesions in the lung	24518179	5	Y
E	197	G>A	p.Asp197Asn	1	Von Hippel-Lindau syndrome Type 2C; intra-adrenal pheochromocytoma 17 yo girl	22946750	5	Y
E	197	G>A	p.Asp197Asn	1	Von Hippel-Lindau syndrome Type 2C; intra-adrenal pheochromocytoma 15 yo boy	22946750	5	Y
E	197	G>A	p.Asp197Asn	1	Von Hippel-Lindau syndrome Type 2C; intra-adrenal pheochromocytoma 73 yo man	22946750	5	Y
E	198	c.593T>G	p.Leu198Arg	1	Von Hippel-Lindau syndrome Type 2: pheochromocytoma	8956040	5	Y
E	198	c.593T>A	p.Leu198Gln	1	Pheochromocytoma	12000816	5	Y
E	198	c.593T>C	p.Leu198Pro	1	Pheochromocytoma adrenal unilateral	12673678	5	Y
E	198	c.593T>C	p.Leu198Pro	1	Family 5, male. Bilateral pheochromocytoma	29124493	5	Y
E	198	c.593T>C	p.Leu198Pro	1	Family 5. Bilateral pheochromocytoma	29124493	5	Y

## Sheet: CNS hemangioblastoma
surface	codon	Variant	Effect	#	Disease	PubMed ID	SCORE	verified
D	7	c.20A>C	p.Asn7Ile	1	CNS (cerebellar) Hemangioblastoma (HB). Male 42 yo	12405390	5	Y
D	12	c.36G>C	p.Glu12Asp	1	Patient 263, age 50. CNS HB	21463266	5	Y
B	65	c.194C>T	p.Ser65Leu	1	Family 1. CNS Hemangioblastoma (HB).	12114495	5	Y
B	65	c.194C>T	p.Ser65Leu	1	CNS Hemangioblastoma (HB)	10567493	5	Y
B	65	c.194C>T	p.Ser65Leu	1	central nervous system (CNS) Hemangioblastoma (HB) [Family 6, Mother]	28388566	5	Y
B	65	c.194C>G	p.Ser65Trp	1	CNS Hemangioblastoma (HB)	10567493	5	Y
B	65	c.194C>G	p.Ser65Trp	1	central nervous system (CNS) Hemangioblastoma (HB) [Family 2, Son]	28388566	5	Y
B	70	c.208G>A	p.Glu70Lys	1	Male 55 yo. CNS HB	25078357	5	Y
B	70	c.208G>A	p.Glu70Lys	1	Female 48 yo. CNS HB	25078357	5	Y
B	70	c.208G>A	p.Glu70Lys	1	Female 64 yo. CNS HB	25078357	5	Y
B	70	c.208G>A	p.Glu70Lys	1	Female 41 yo. CNS HB	25078357	5	Y
B	74	c.221T>G	p.Val74Gly	1	CNS Hemangioblastoma (HB)	10567493	5	Y
B	76	c.226T>A	p.Phe76Ile	2	Von Hippel-Lindau syndrome Type 1: CNS Hemangioblastoma (HB)	7728151	5	Y
B	78	c.233A>G	p.Asn78Ser	1	CNS Hemangioblastoma (HB)	10567493	5	Y
B	78	c.233A>G	p.Asn78Ser	1	CNS (cerebellar) Hemangioblastoma (HB). Female 26 yo	12405390	5	Y
B	80	c.240T>G	p.Ser80Arg	1	CNS (spinal) Hemangioblastoma (HB). Male 46 yo	12405390	5	Y
B	80	c.240T>G	p.Ser80Arg	1	CNS (cerebellar) Hemangioblastoma (HB). Male 47 yo	12405390	5	Y
B	80	c.239G>A	p.Ser80Asn	1	CNS Hemangioblastoma (HB)	10567493	5	Y
B	80	c.239G>T	p.Ser80Ile	1	CNS Hemangioblastoma (HB) multiple	24678776	5	Y
B	81	c.241C>T	p.Pro81Ser	1	Von Hippel-Lindau syndrome:CNS Hemangioblastoma (HB)	10761708	5	Y
B	81	c.241C>T	p.Pro81Ser	1	CNS Hemangioblastoma (HB)	17661816	5	Y
B	81	c.241C>T	p.Pro81Ser	1	CNS Hemangioblastoma (HB)	10567493	5	Y
B	81	c.241C>T	p.Pro81Ser	1	Von Hippel-Lindau syndrome Type 1: CNS Hemangioblastoma (HB)	8634692	5	Y
B	86	c.257C>T	p.Pro86Leu	1	central nervous system (CNS) Hemangioblastoma (HB) [Family 20, Daughter]	28388566	5	Y
B	86	c.256C>T	p.Pro86Ser	1	Multiple CNS Hemangioblastoma (HB)	20151405	5	Y
B	86	c.256C>T	p.Pro86Ser	1	Cerebellar (CNS) Hemangioblastoma (HB)	17024664	5	Y
B	86	c.256C>T	p.Pro86Ser	1	Von Hippel-Lindau syndrome Type 1: CNS Hemangioblastoma (HB)	10761708	5	Y
B	88	c.262T>A	p.Trp88Arg	1	CNS Hemangioblastoma (HB)	10567493	5	Y
B	88	c.264G>C	p.Trp88Cys	1	CNS Hemangioblastoma (HB)	10567493	5	Y
B	88	c.263G>C	p.Trp88Ser	1	cerebellar (CNS) Hemangioblastoma (HB)	8069849	5	Y
B	88	c.263G>C	p.Trp88Ser	1	central nervous system (CNS) Hemangioblastoma (HB) [Family 23, Son of Aunt3]	28388566	5	Y
B	89	c.266T>C	p.Leu89Pro	1	CNS Hemangioblastoma (HB)	10567493	5	Y
B	90	c.269A>T	p.Asn90Ile	1	central nervous system (CNS) Hemangioblastoma (HB) [Family 28, Brother1]	28388566	5	Y
B	91	c.273C>G	p.Phe91Leu	1	cerebellar (CNS) Hemangioblastoma (HB)	9829912	5	Y
B	93	c.277G>C	p.Gly93Arg	1	CNS (cerebellar) Hemangioblastoma (HB). Female 49 yo	12405390	5	Y
B	98	c.292T>C	p.Tyr98His	1	CNS Hemangioblastoma (HB)	10567493	5	Y
B	101	c.302T>G	p.Leu101Arg	1	Von Hippel-Lindau syndrome Type 1: CNS Hemangioblastoma (HB)	12624160	5	Y
B	101	c.302T>G	p.Leu101Arg	1	Female 26 yo. CNS HB	25078357	5	Y
C	104	c.311G>C	p.Gly104Ala	1	cerebellar (CNS) Hemangioblastoma (HB)	9829912	5	Y
C	111	c.331A>C	p.Ser111Arg	1	CNS Hemangioblastoma (HB)	10567493	5	Y
C	111	c.333C>G	p.Ser111Arg	1	Von Hippel-Lindau syndrome Type 1: CNS HB	7728151	5	Y
C	114	c.340G>T	p.Gly114Cys	1	cerebellar (CNS) Hemangioblastoma (HB)	17024664	5	Y
C	115	c.344A>G	p.His115Arg	1	CNS Hemangioblastoma (HB)	10567493	5	Y
C	117	c.349T>G	p.Trp117Gly	1	central nervous system (CNS) Hemangioblastoma (HB) [family 6, son]	24581539	5	Y
C	132	c.395A>C	p.Gln132Pro	1	CNS Hemangioblastoma (HB)	10567493	5	Y
C	135	c.405A>C	p.Leu135Phe	1	cerebellar (CNS) Hemangioblastoma (HB) with tumor recurrence >2 times	8069849	5	Y
C	136	c.407T>G	p.Phe136Cys	1	CNS Hemangioblastoma (HB)	10567493	5	Y
C	136	c.407T>C	p.Phe136Ser	1	CNS Hemangioblastoma (HB)	10567493	5	Y
C	136	c.407T>C	p.Phe136Ser	1	Patient 207, age 30. CNS HB	21463266	5	Y
C	149	c.445G>T	p.Ala149Ser	1	VI-9: female, CNS HB	9435426	5	Y
C	151	c.452T>G	p.Ile151Ser	1	CNS Hemangioblastoma (HB)	20151405	5	Y
C	151	c.452T>C	p.Ile151Thr	1	CNS Hemangioblastoma (HB)	10567493	5	Y
C	152	c.454A>C	p.Thr152Pro	1	CNS (cerebellar) Hemangioblastoma (HB). Male 28 yo	12405390	5	Y
C	152	c.454A>C	p.Thr152Pro	1	CNS (cerebellar) Hemangioblastoma (HB). Male 28 yo	12405390	5	Y
A	158	c.472C>G	p.Leu158Val	1	CNS (cerebellar) Hemangioblastoma (HB). Female 21 yo	12405390	5	Y
A	161	c.482G>A	p.Arg161Gln	1	CNS Hemangioblastoma (HB)	10567493	5	Y
A	161	c.481C>G	p.Arg161Gly	1	CNS Hemangioblastoma (HB)	10567493	5	Y
A	161	c.482G>C	p.Arg161Pro	1	CNS Hemangioblastoma (HB)	10567493	5	Y
A	162	c.484T>C	p.Cys162Arg	1	CNS Hemangioblastoma (HB)	8829648	5	Y
A	162	c.486C>G	p.Cys162Trp	1	CNS Hemangioblastoma (HB)	10567493	5	Y
A	162	c.486C>G	p.Cys162Trp	1	central nervous system (CNS) Hemangioblastoma (HB) [Family 67, Proband]	28388566	5	Y
A	162	c.486C>G	p.Cys162Trp	1	39 yo male with CNS Hemangioblastoma (HB); No family history	19270817	5	Y
A	162	c.486C>G	p.Cys162Trp	1	Von Hippel-Lindau syndrome Type 1: CNS Hemangioblastoma (HB)	7728151	5	Y
A	162	c.485G>A	p.Cys162Tyr	1	Von Hippel-Lindau syndrome Type 1: CNS Hemangioblastoma (HB)	8634692	5	Y
A	162	c.485G>A	p.Cys162Tyr	1	Von Hippel-Lindau syndrome Type 1: CNS Hemangioblastoma (HB)	10761708	5	Y
A	167	c.500G>A	p.Arg167Gln	1	Von Hippel-Lindau syndrome Type 1: central nervous system (CNS) Hemangioblastoma (HB) [Family 11]	27439424	5	Y
A	167	c.500G>A	p.Arg167Gln	1	CNS Hemangioblastoma (HB)	10567493	5	Y
A	167	c.500G>A	p.Arg167Gln	1	central nervous system (CNS) Hemangioblastoma (HB) [Family 80, Proband]	28388566	5	Y
A	167	c.499C>T	p.Arg167Trp	1	CNS Hemangioblastoma (HB)	10567493	5	Y
A	167	c.499C>T	p.Arg167Trp	1	central nervous system (CNS) Hemangioblastoma (HB) [Family 74, Proband]	28388566	5	Y
A	167	c.499C>T	p.Arg167Trp	1	central nervous system (CNS) Hemangioblastoma (HB) [Family 77, Proband]	28388566	5	Y
A	170	c.509T>A	p.Val170Asp	1	cerebellar (CNS) hemangioblastoma (HB) [Family E, II-2]	9681858	5	Y
A	170	c.509T>A	p.Val170Asp	1	CNS Hemangioblastoma (HB) [Family E, III-6]	9681858	5	Y
A	178	c.533T>G	p.Leu178Arg	1	CNS Hemangioblastoma (HB) [Family 7, sister]	22357542	5	Y
A	178	c.533T>A	p.Leu178Gln	1	CNS Hemangioblastoma (HB)	10567493	5	Y
A	178	c.533T>C	p.Leu178Pro	1	CNS Hemangioblastoma (HB)	10567493	5	Y

## Sheet: retinal Hb
surface	codon	Variant	Effect	#	Disease	PubMed ID	SCORE	verified
B	65		p.Ser65Leu	2	Von Hippel-Lindau syndrome: retinal Hemangioblastoma (HB)	10088816	5	Y
B	68	c.202T>C	p.Ser68Pro	1	Retinal Hemangioblastoma (HB)	17661816	5	Y
B	70	c.208G>A	p.Glu70Leu	1	Bilateral Retinal Hemangioblastoma (HB)	17661816	5	Y
B	70	c.208G>A	p.Glu70Lys	1	Von Hippel-Lindau syndrome Type 1: Retinal Hemangioblastoma (HB) [Family 3]	27439424	5	Y
B	70	c.208G>A	p.Glu70Lys	1	Von Hippel-Lindau syndrome Type 1: Retinal Hemangioblastoma (HB) [Family 4]	27439424	5	Y
B	70	c.208G>A	p.Glu70Lys	1	male 11yo. Retinal HB	25078357	5	Y
B	70	c.208G>A	p.Glu70Lys	1	Female 16 yo. Retinal HB	25078357	5	Y
B	78		p.Asn78His	2	Von Hippel-Lindau syndrome: retinal Hemangioblastoma (HB)	10088816	5	Y
B	78	c.233A>G	p.Asn78Ser	1	Retinal Hemangioblastoma (HB)	12202531	5	Y
B	78		p.Asn78Ser	2	Von Hippel-Lindau syndrome: retinal Hemangioblastoma (HB)	10088816	5	Y
B	80	c.238A>C	p.Ser80Arg	1	Retinal Hemangioblastoma (HB)	12202531	5	Y
B	80	c.239G>A	p.Ser80Asn	1	Retinal Hemangioblastoma (HB)	17661816	5	Y
B	80	c.239G>A	p.Ser80Asn	1	Retinal Hemangioblastoma (HB)	12202531	5	Y
B	82	c.245G>C	p.Arg82Pro	1	Retinal Hemangioblastoma (HB)	12202531	5	Y
B	86	c.256C>G	p.Pro86Ala	1	Von Hippel-Lindau syndrome Type 1: Retinal Hemangioblastoma (HB)	7728151	5	Y
B	86	c.257C>T	p.Pro86Leu	1	Von Hippel-Lindau syndrome Type 1: Retinal Hemangioblastoma (HB)	10761708	5	Y
B	86	c.257C>T	p.Pro86Leu	1	Von Hippel-Lindau syndrome Type 1: retinal hemangioblastoma (HB)	8634692	5	Y
B	86	c.257C>T	p.Pro86Leu	1	Patient 400, age 11. retinal HB	21463266	5	Y
B	86	c.256C>T	p.Pro86Ser	1	Retinal Hemangioblastoma (HB)	12202531	5	Y
B	86	c.256C>T	p.Pro86Ser	1	Retinal Hemangioblastoma (HB) [Family 18, Daughter]	28388566	5	Y
B	89		p.Leu89Pro	1	Von Hippel-Lindau syndrome: retinal Hemangioblastoma (HB)	10088816	5	Y
B	91	c.263G>C	p.Phe91Leu	1	Retinal Hemangioblastoma (HB)	12202531	5	Y
C	104	c.311G>C	p.Gly104Ala	1	Retinal Hemangioblastoma (HB)	12202531	5	Y
C	104	c.312C>G	p.Gly104Gly	1	Retinal Hemangioblastoma (HB)	9829912	5	Y
C	105	c.313A>C	p.Thr105Pro	1	Retinal Hemangioblastoma (HB)	12202531	5	Y
C	111	c.333C>A	p.Ser111Arg	1	Von Hippel-Lindau syndrome: retinal Hemangioblastoma (HB)	10088816	5	Y
C	111		p.Ser111Asn	2	Von Hippel-Lindau syndrome: retinal Hemangioblastoma (HB)	10088816	5	Y
C	111	c.331A>T	p.Ser111Cys	1	Retinal Hemangioblastoma (HB)	12202531	5	Y
C	114	c.340G>C	p.Gly114Arg	1	Retinal Hemangioblastoma (HB)	12202531	5	Y
C	114		p.Gly114Cys	1	Von Hippel-Lindau syndrome: retinal Hemangioblastoma (HB)	10088816	5	Y
C	115	c.343C>T	p.His115Tyr	1	Retinal Hemangioblastoma (HB)	12202531	5	Y
C	116	c.346C>G	p.Leu116Val	3	Retinal Hemangioblastoma (HB)	17024664	5	Y
C	116		p.Leu116Val	3	Von Hippel-Lindau syndrome: retinal Hemangioblastoma (HB)	10088816	5	Y
C	117	c.351G>T	p.Trp117Cys	1	Retinal Hemangioblastoma (HB)	12202531	5	Y
C	118		p.Leu118Arg	3	Von Hippel-Lindau syndrome: retinal Hemangioblastoma (HB)	10088816	5	Y
C	118	c.353T>C	p.Leu118Pro	1	Retinal Hemangioblastoma (HB)	12202531	5	Y
C	118	c.353T>C	p.Leu118Pro	2	Von Hippel-Lindau syndrome: retinal Hemangioblastoma (HB)	10088816	5	Y
C	130	c.388G>C	p.Val130Leu	1	Retinal Hemangioblastoma (HB)	12202531	5	Y
C	136	c.407T>C	p.Phe136Ser	1	Retinal Hemangioblastoma (HB)	12202531	5	Y
C	149	c.445G>T	p.Ala149Ser	1	V-6: female, retinal HB	9435426	5	Y
C	149	c.445G>T	p.Ala149Ser	1	V-9: female, retinal Hb	9435426	5	Y
C	149	c.445G>T	p.Ala149Ser	1	VI-3: female, retinal HB	9435426	5	Y
C	149	c.445G>T	p.Ala149Ser	1	VI-5: male, retinal HB	9435426	5	Y
C	151	c.452T>C	p.Ile151Thr	4	retinal hemangioblastoma (HB)	17024664	5	Y
A	155	c.463G>C	p.Val155Leu	1	Retinal Hemangioblastoma (HB)	12202531	5	Y
A	156	c.467A>G	p.Tyr156Cys	1	Retinal Hemangioblastoma (HB)	12202531	5	Y
A	158	c.473T>C	p.Leu158Pro	1	Retinal Hemangioblastoma (HB)	17661816	5	Y
A	158	c.473T>C	p.Leu158Pro	1	Retinal Hemangioblastoma (HB)	12202531	5	Y
A	161	c.482G>A	p.Arg161Gln	1	Retinal Hemangioblastoma (HB)	12202531	5	Y
A	164		p.Gln164Arg	1	Von Hippel-Lindau syndrome: retinal Hemangioblastoma (HB)	10088816	5	Y
A	166	c.496G>T	p.Val166Phe	1	Retinal Hemangioblastoma (HB)	12202531	5	Y
A	166		p.Val166Phe	2	Von Hippel-Lindau syndrome: retinal Hemangioblastoma (HB)	10088816	5	Y
A	167	c.500G>A	p.Arg167Gln	1	Multiple Retinal Hemangioblastoma (HB)	14722919	5	Y
A	167	c.550G>A	p.Arg167Gln	1	Retinal Hemangioblastoma (HB)	12202531	5	Y
A	167		p.Arg167Gln	4	Von Hippel-Lindau syndrome: retinal Hemangioblastoma (HB)	10088816	5	Y
A	167	c.499C>T	p.Arg167Trp	1	Von Hippel-Lindau syndrome Type 1: Retinal Hemangioblastoma (HB)	7728151	5	Y
A	167	c.499C>T	p.Arg167Trp	1	retinal hemangioblastoma (HB) [Family 6, sister 2]	22357542	5	Y
A	167	c.499C>T	p.Arg167Trp	1	Retinal Hemangioblastoma (HB)	12202531	5	Y
A	167		p.Arg167Trp	2	Von Hippel-Lindau syndrome: retinal Hemangioblastoma (HB)	10088816	5	Y
A	169	c.506T>C	p.Leu169Pro	1	Patient 344, age 21. retinal HB	21463266	5	Y
A	170	c.509T>A	p.Val170Asp	1	retinal Hemangioblastoma (HB) [Family E, III-13]	9681858	5	Y
A	170		p.Val170Phe	1	Von Hippel-Lindau syndrome: retinal Hemangioblastoma (HB)	10088816	5	Y
A	178	c.533T>G	p.Leu178Arg	1	Von Hippel-Lindau syndrome: retinal Hemangioblastoma (HB)	10088816	5	Y
A	178	c.533T>C	p.Leu178Pro	1	Von Hippel-Lindau syndrome Type 1: retinal hemangioblastoma (HB)	7728151	5	Y
A	180	c.538A>G	p.Ile180Val	3	Von Hippel-Lindau syndrome: retinal Hemangioblastoma (HB)	10088816	5	Y
A	188	c.563T>C	p.Leu188Pro	1	Retinal Hemangioblastoma (HB)	12202531	5	Y

## Sheet: colorectal cancer
surface	codon	Variant	Effect	#	Disease	PubMed ID	SCORE	verified
D	14	G>A	p.Gly14Asp	1	colorectal cancer	25344691	5	Y
D	29	c.86G>A	p.Gly29Asp	1	colorectal cancer	22895193	5	Y
D	52	G>A	p.Glu52Lys	1	colorectal cancer	25344691	5	Y
C	117	c.349T>C	p.Trp117Arg	1	colorectal cancer. Tumor no. 32	14965365	5	Y
C	117	c.349T>C	p.Trp117Arg	1	colorectal cancer. Tumor no. 80	14965365	5	Y
C	118	c.353T>C	p.Leu118Pro	1	colorectal cancer. Tumor no. 72	14965365	5	Y
C	127	c.380G>T	p.Gly127Val	1	colorectal cancer	22895193	5	Y
C	139	c.415T>C	p.Ser139Pro	1	colorectal cancer	25344691	5	Y
A	160	c.478G>A	p.Glu160Lys	1	colorectal cancer. Tumor no. 21	14965365	5	Y
A	166	c.496G>A	p.Val166Ile	1	colorectal cancer. Tumor no. 128	14965365	5	Y
A	166	c.496G>A	p.Val166Ile	1	Colorectal cancer. Tumor no. 18	14965365	5	Y
A	167	c.499C>T	p.Arg167Trp	1	colorectal cancer. Tumor no. 63	14965365	5	Y
A	176	c.527G>A	p.Arg176Lys	1	Colorectal cancer. Tumor no. 18	14965365	5	Y
A	179	c.536A>C	p.Asp179Ala	1	Colorectal cancer. Tumor no. 104	14965365	5	Y
A	179	c.535G>A	p.Asp179Asn	1	colorectal cancer. Tumor no. 102	14965365	5	Y
A	182	c.545G>A	p.Arg182Lys	1	Colorectal cancer. Tumor no. 104	14965365	5	Y
E	201	c.602T>C	p.Leu201Pro	1	colorectal cancer	22895193	5	Y
E	204	c.612G>T	p.Glu204Asp	1	colorectal cancer. Tumor no. 102	14965365	5	Y
E	205	c.614G>A	p.Arg205His	1	colorectal cancer	22895193	5	Y
E	207	c.619G>A	p.Ala207Thr	1	colorectal cancer. Tumor no. 108	14965365	5	Y

## Sheet: paraganglioma
surface	codon	Variant	Effect	#	Disease	PubMed ID	SCORE	verified
B	64	c.191G>C	p.Arg64Pro	1	35 yo. Unifocal (Adrenal) paraganglioma (PGL)	28944243	5	Y
A	164	c.491G>C	p.Gln164His	1	Patient 9: Abdominal paraganglioma	12807974	5	Y
A	166	c.496G > T	p.Val166Phe	1	paraganglioma (PGL)	21784903	5	Y
A	167	c.499C>T	p.Arg167Trp	1	17 yo. Unifocal (Adrenal) paraganglioma (PGL)	28944243	5	Y
A	183	c.548C>G	p.Ser183Trp	1	Family 8, female. Sympathetic paraganglioma (PGL)	29124493	5	Y
E	198	c.593T>G	p.Leu198Arg	1	paraganglioma	24694336	5	Y

## Sheet: pancreas + PNET
surface	codon	Variant	Effect	#	Disease	PubMed ID	SCORE	verified
B	65	c.194C>T	p.Ser65Leu	1	multiple pancreatic cysts or tumors (PCT) [Family 6, Uncle 3]	28388566	5	Y
B	78	c.233A>G	p.Asn78Ser	1	multiple pancreatic cysts or tumors (PCT) [Family 12, Sister]	28388566	5	Y
B	78	c.233A>G	p.Asn78Ser	1	pancreatic neoplastic cysts (pancreatic cysts or tumors)	22158988	5	Y
B	80	c.240T>G	p.Ser80Arg	1	pancreatic neoplastic cysts (pancreatic cysts or tumors)	22158988	5	Y
B	90	c.269A>T	p.Asn90Ile	1	multiple pancreatic cysts or tumors (PCT) [Family 27, Aunt2]	28388566	5	Y
B	98	c.293A>C	p.Tyr98Ser	1	multiple pancreatic cysts or tumors (PCT) [Family 35, Proband]	28388566	5	Y
B	98	c.293A>C	p.Tyr98Ser	1	multiple pancreatic cysts or tumors (PCT) [Family 35, Sister]	28388566	5	Y
C	117	c.349T>G	p.Trp117Gly	1	pancreatic cysts or tumors [Family 6, Sister 1]	24581539	5	Y
C	117	c.349T>G	p.Trp117Gly	1	multiple pancreatic cysts or tumors (PCT) [Family 42, Sister1]	28388566	5	Y
C	117	c.350G>T	p.Trp117Leu	1	pancreatic neoplastic cysts (pancreatic cysts or tumors)	22158988	5	Y
A	162	c.486C>G	p.Cys162Trp	1	pancreatic neoplastic cysts (pancreatic cysts or tumors)	22158988	5	Y
A	162	c.486C>G	p.Cys162Trp	1	Patient 78, age 29. pancreatic cysts or tumors	21463266	5	Y
A	167	c.499C>T	p.Arg167Trp	1	pancreatic cysts or tumors [Family 6, sister 1]	22357542	5	Y

## Sheet: single_phenotypes
phenotype	# patients
renal phenotypes (RCC, ccRCC, cysts, ..)	613
pheochromocytoma	259
retinal hemangioblastomas	87
CNS hemangioblastomas	77
colorectal cancer	20
Pancreas (tumors, cysts) + PNET	13
paraganglioma	6
ep/ov cystadenoma	0
endolymphatic sac tumor	0
	1075
